# Supplementary material
Source: Research Square preprint supplement (doi:10.21203/rs.3.rs-8004802/v1)

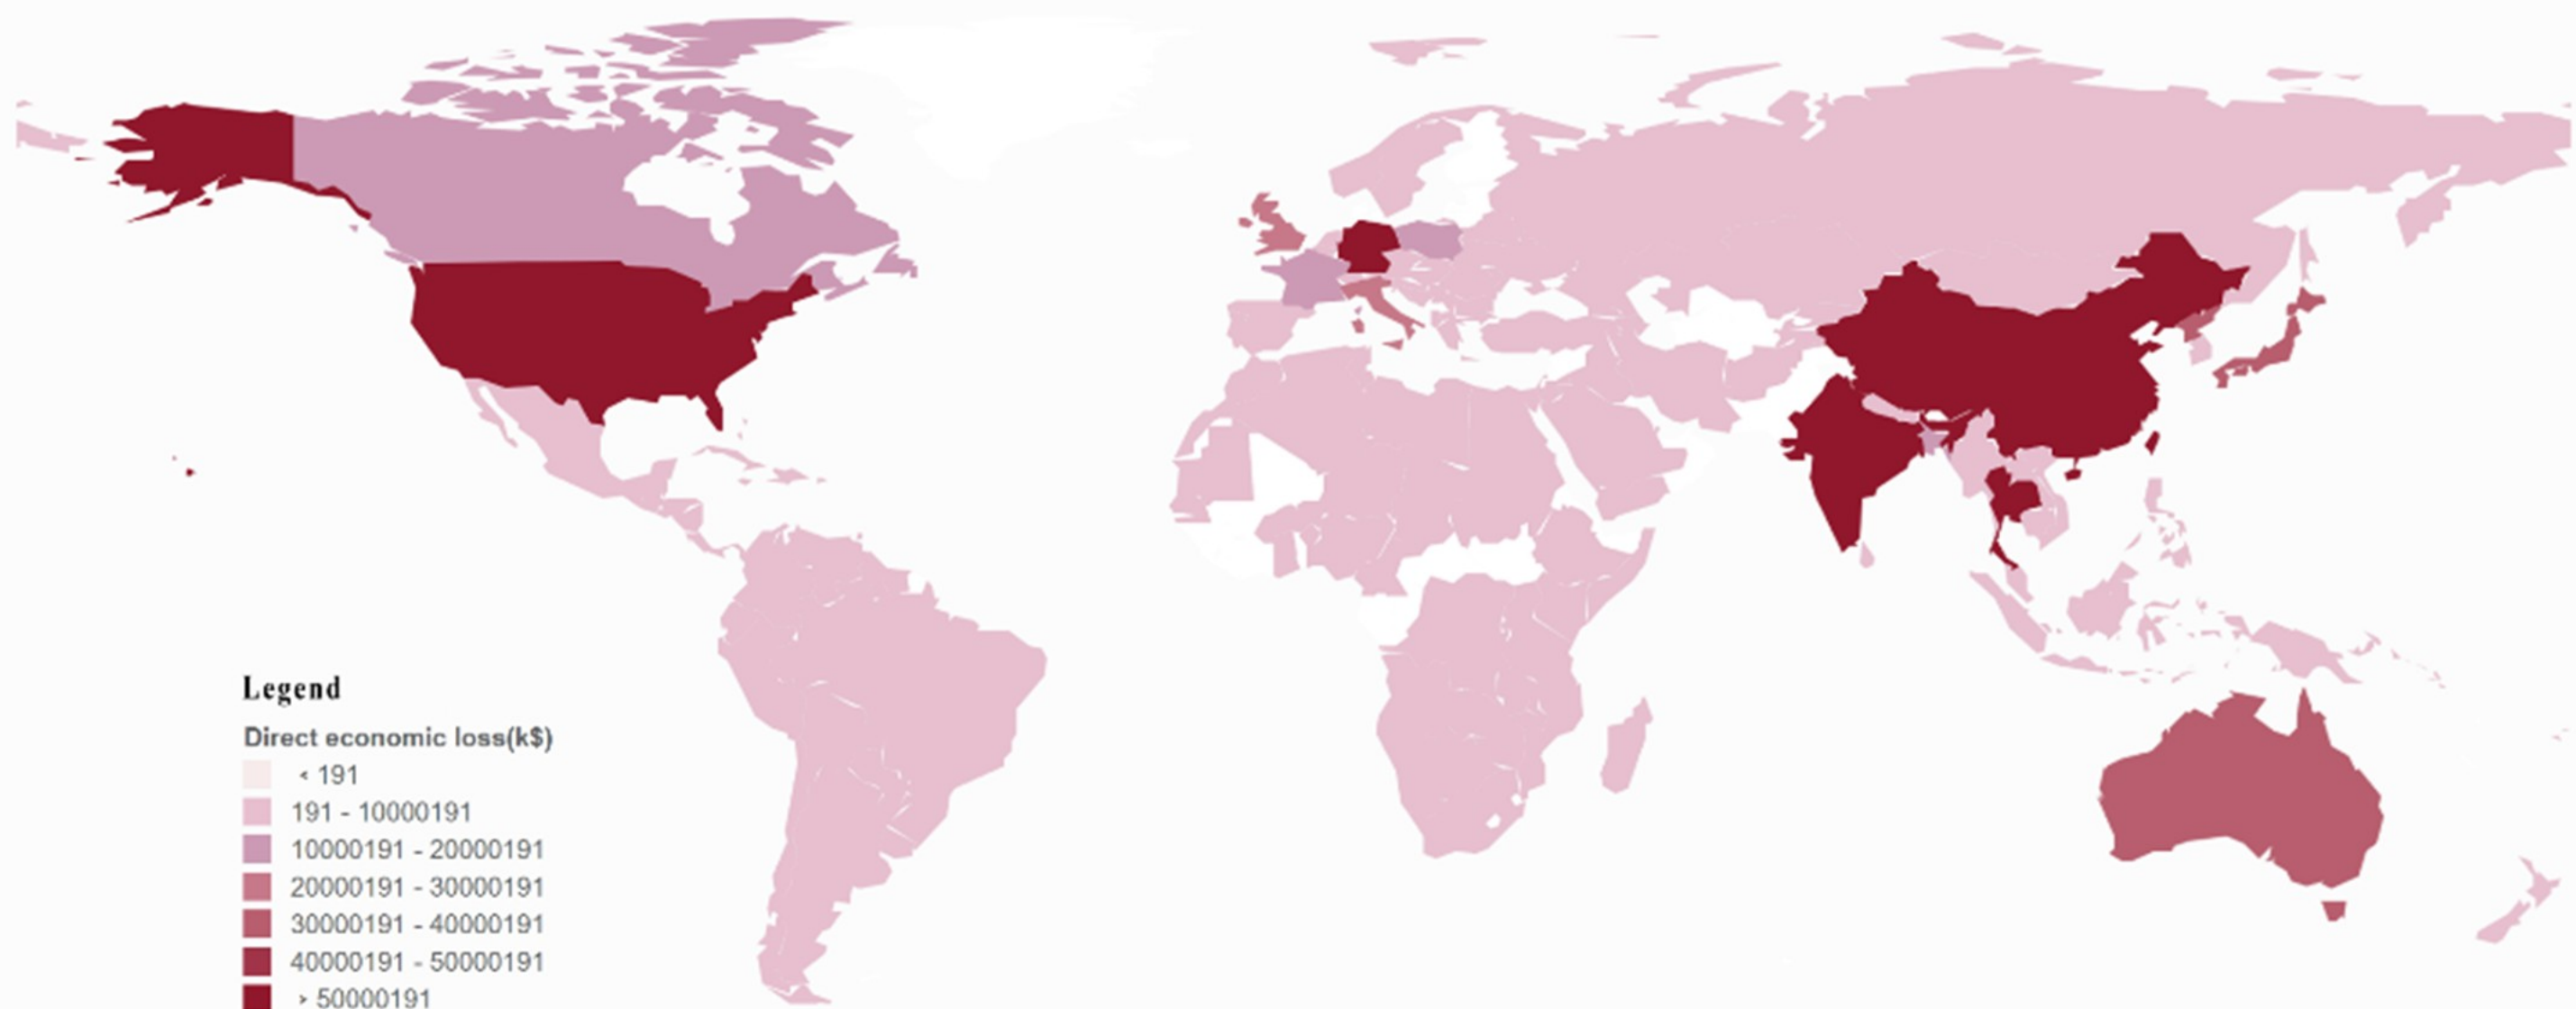

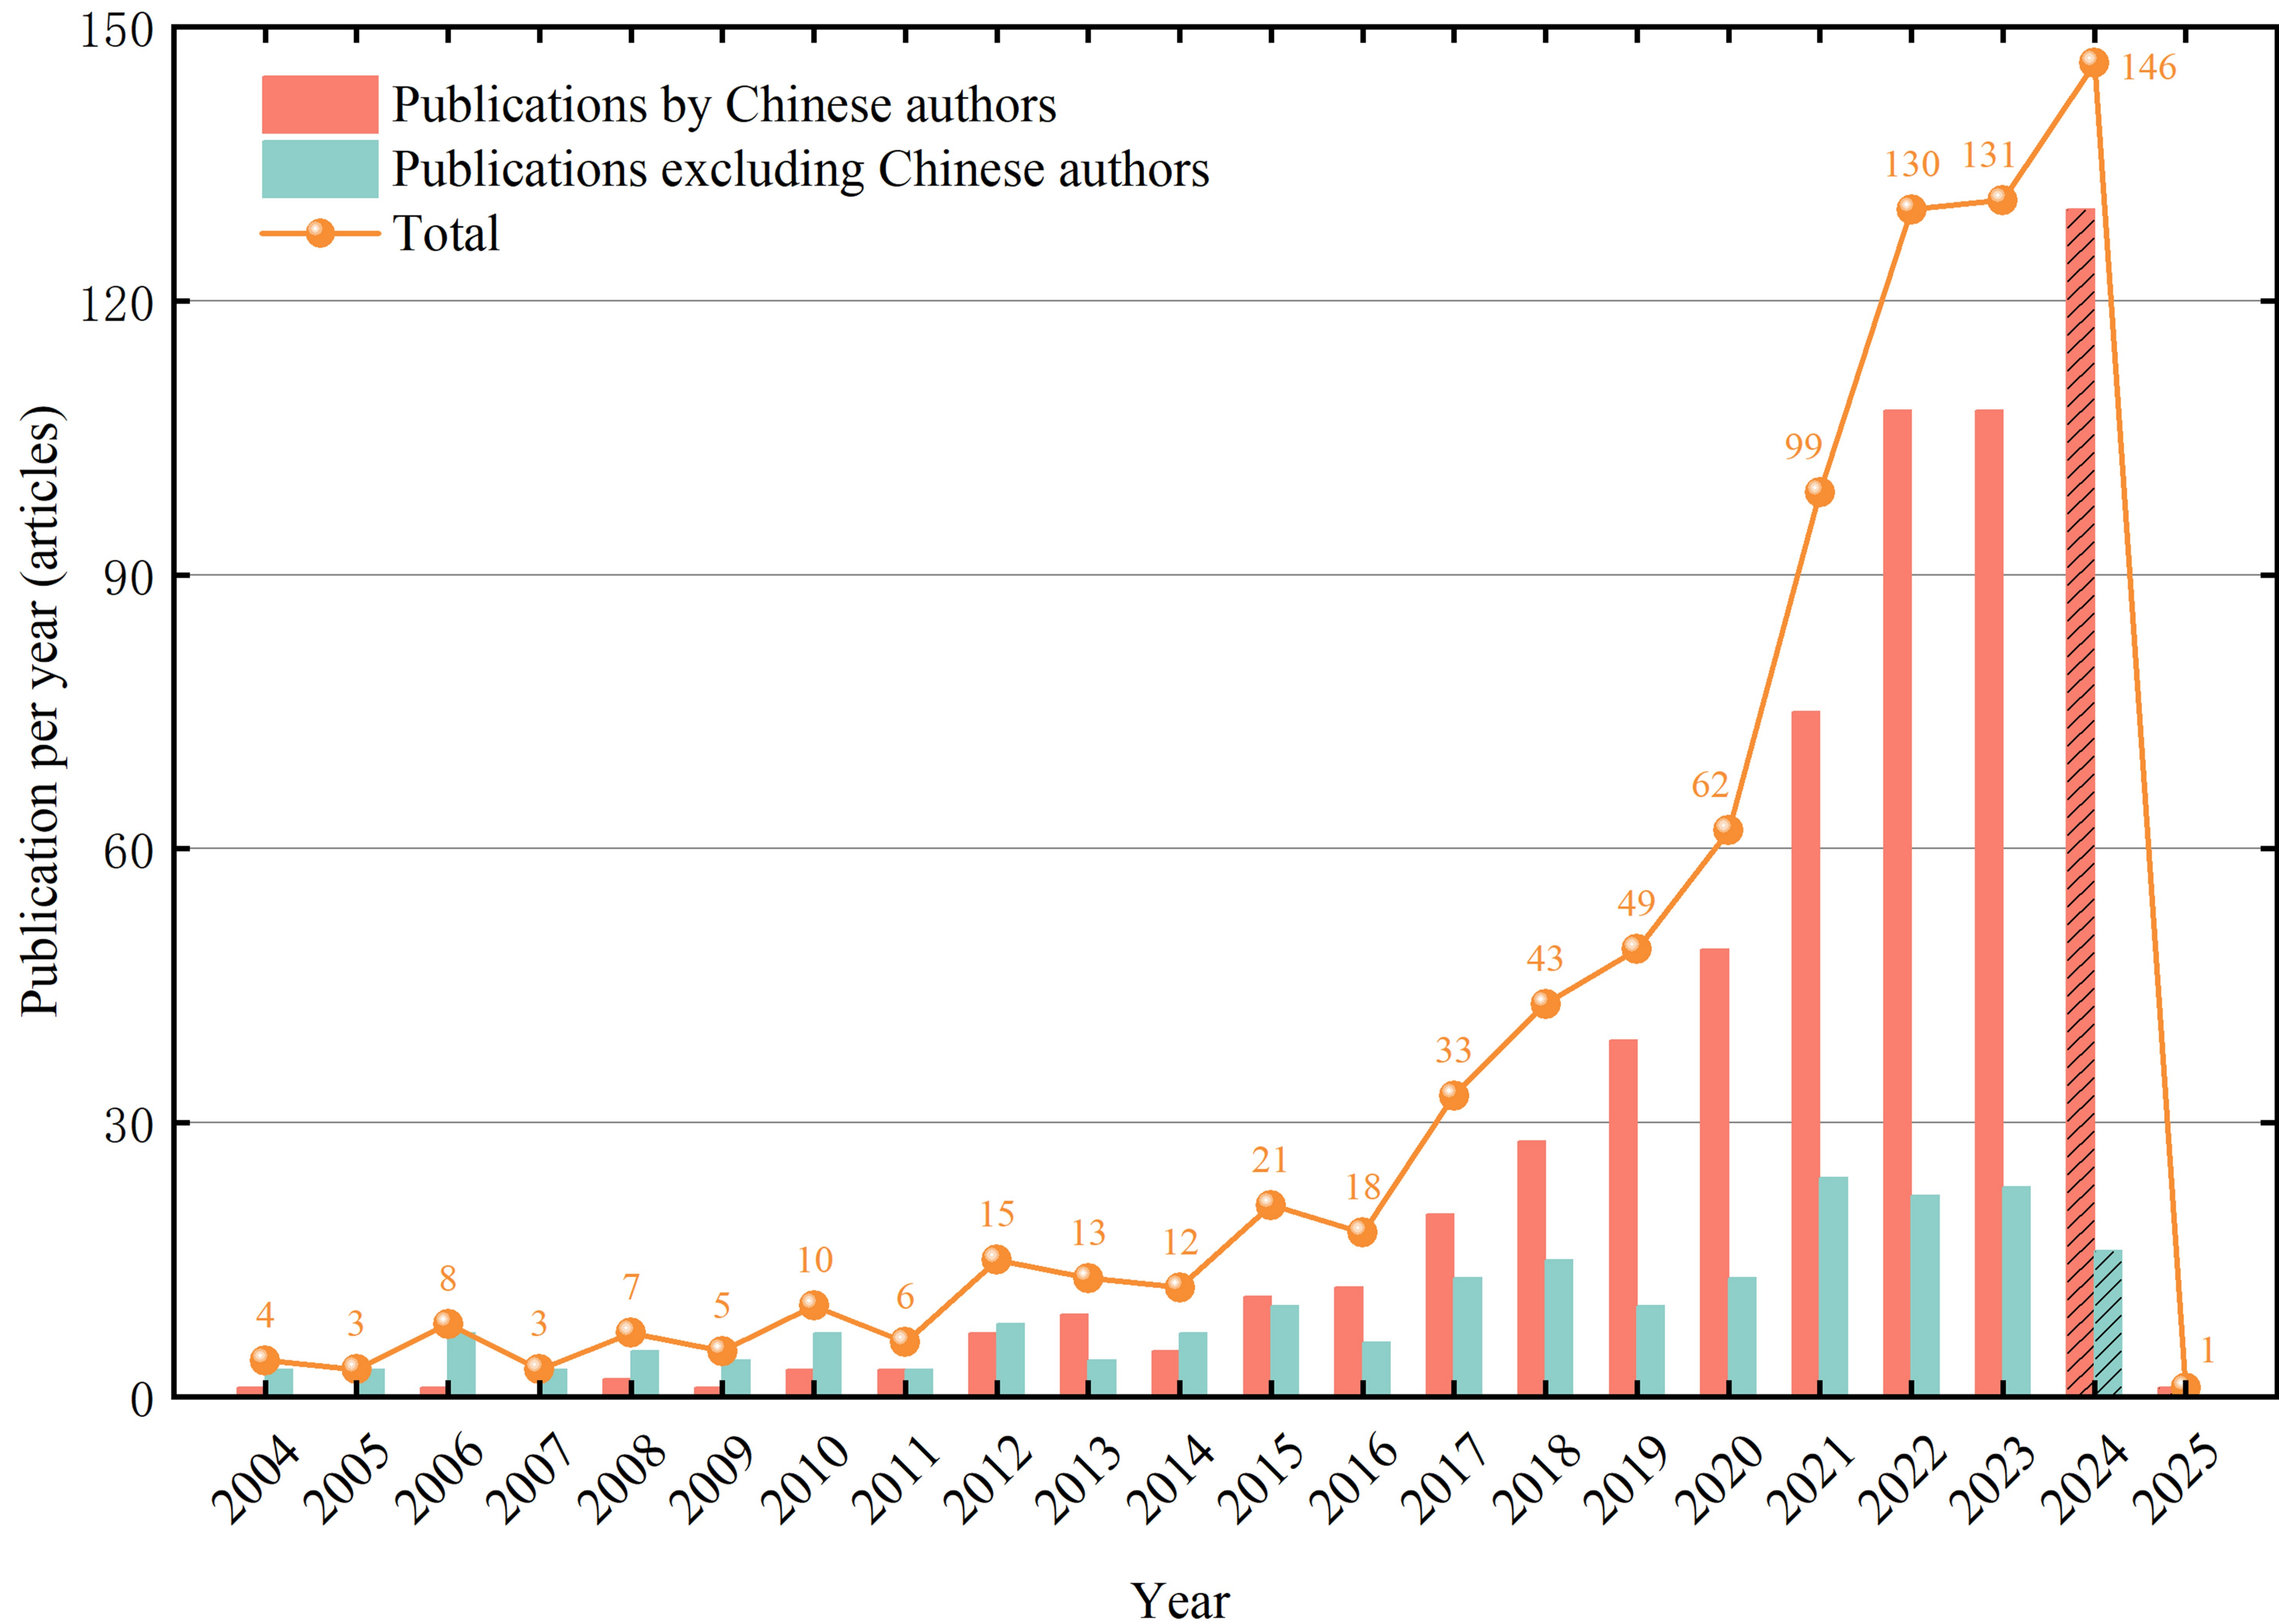

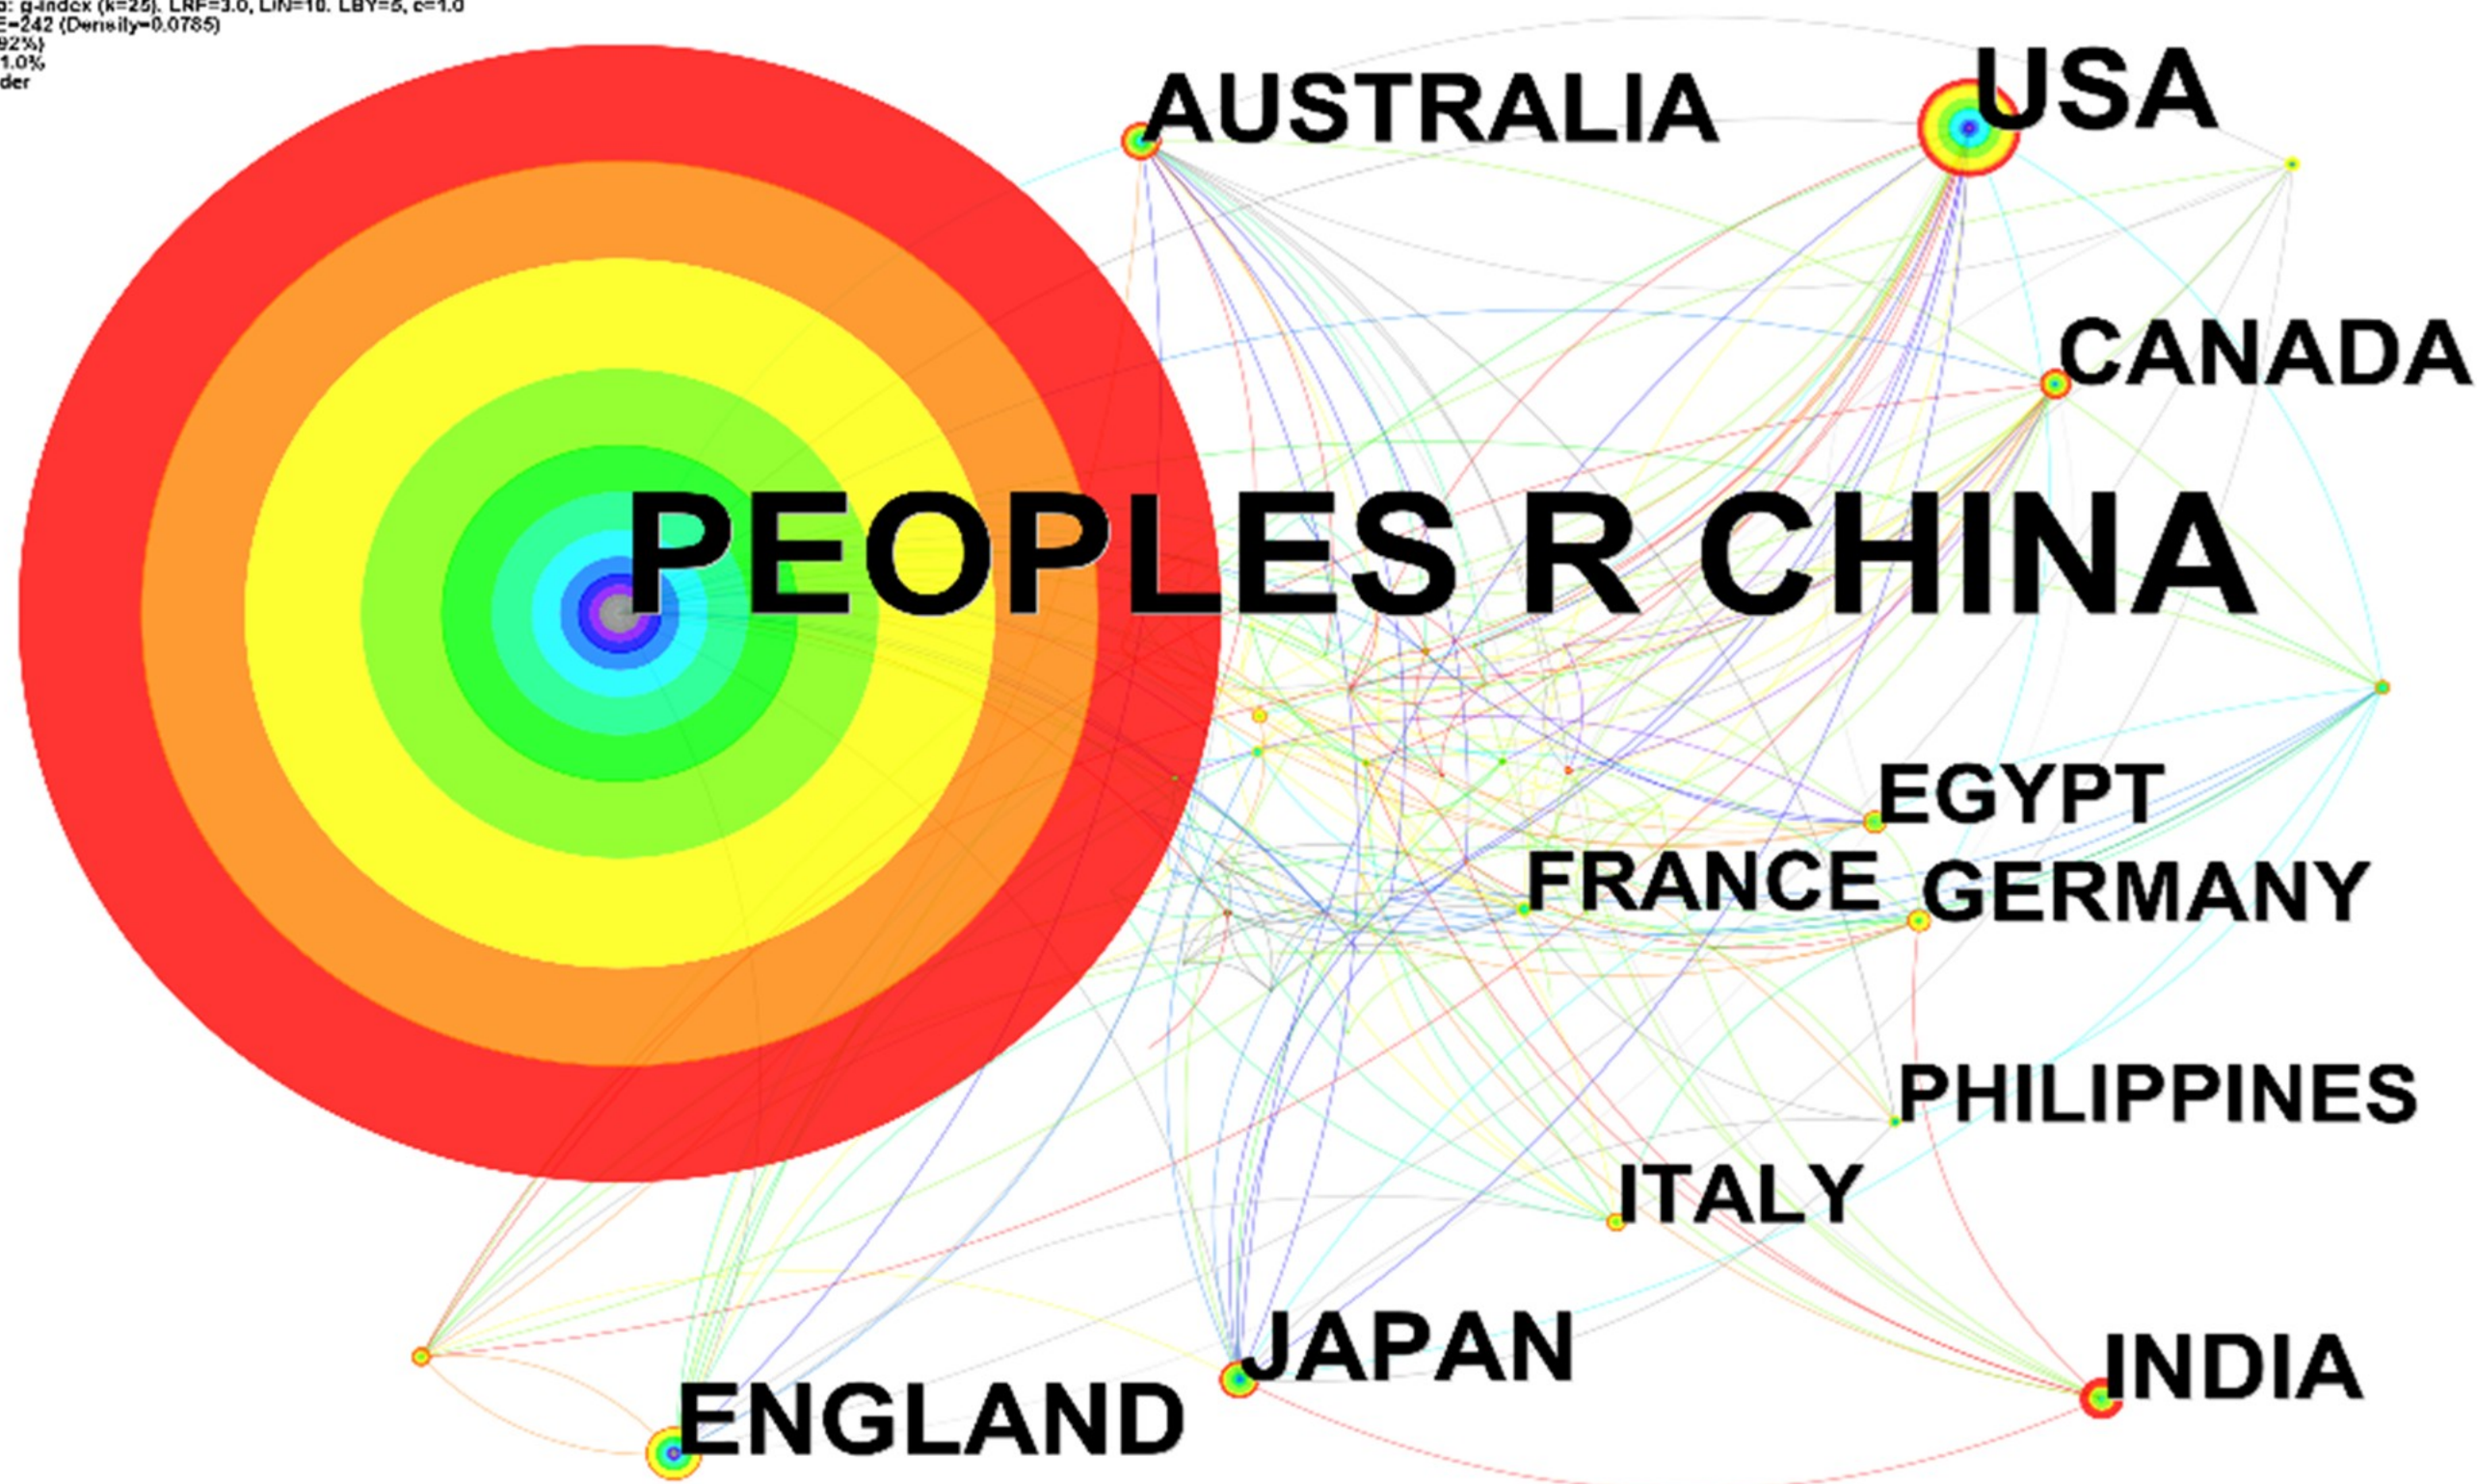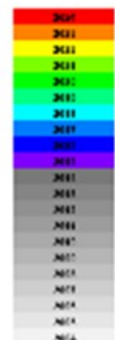

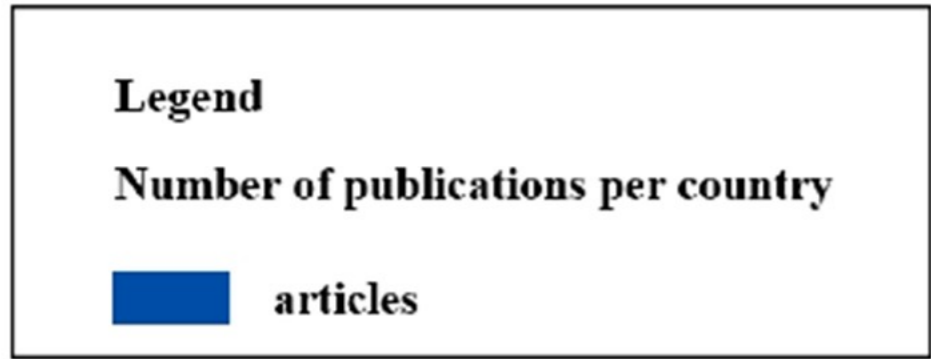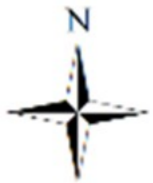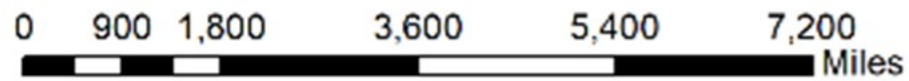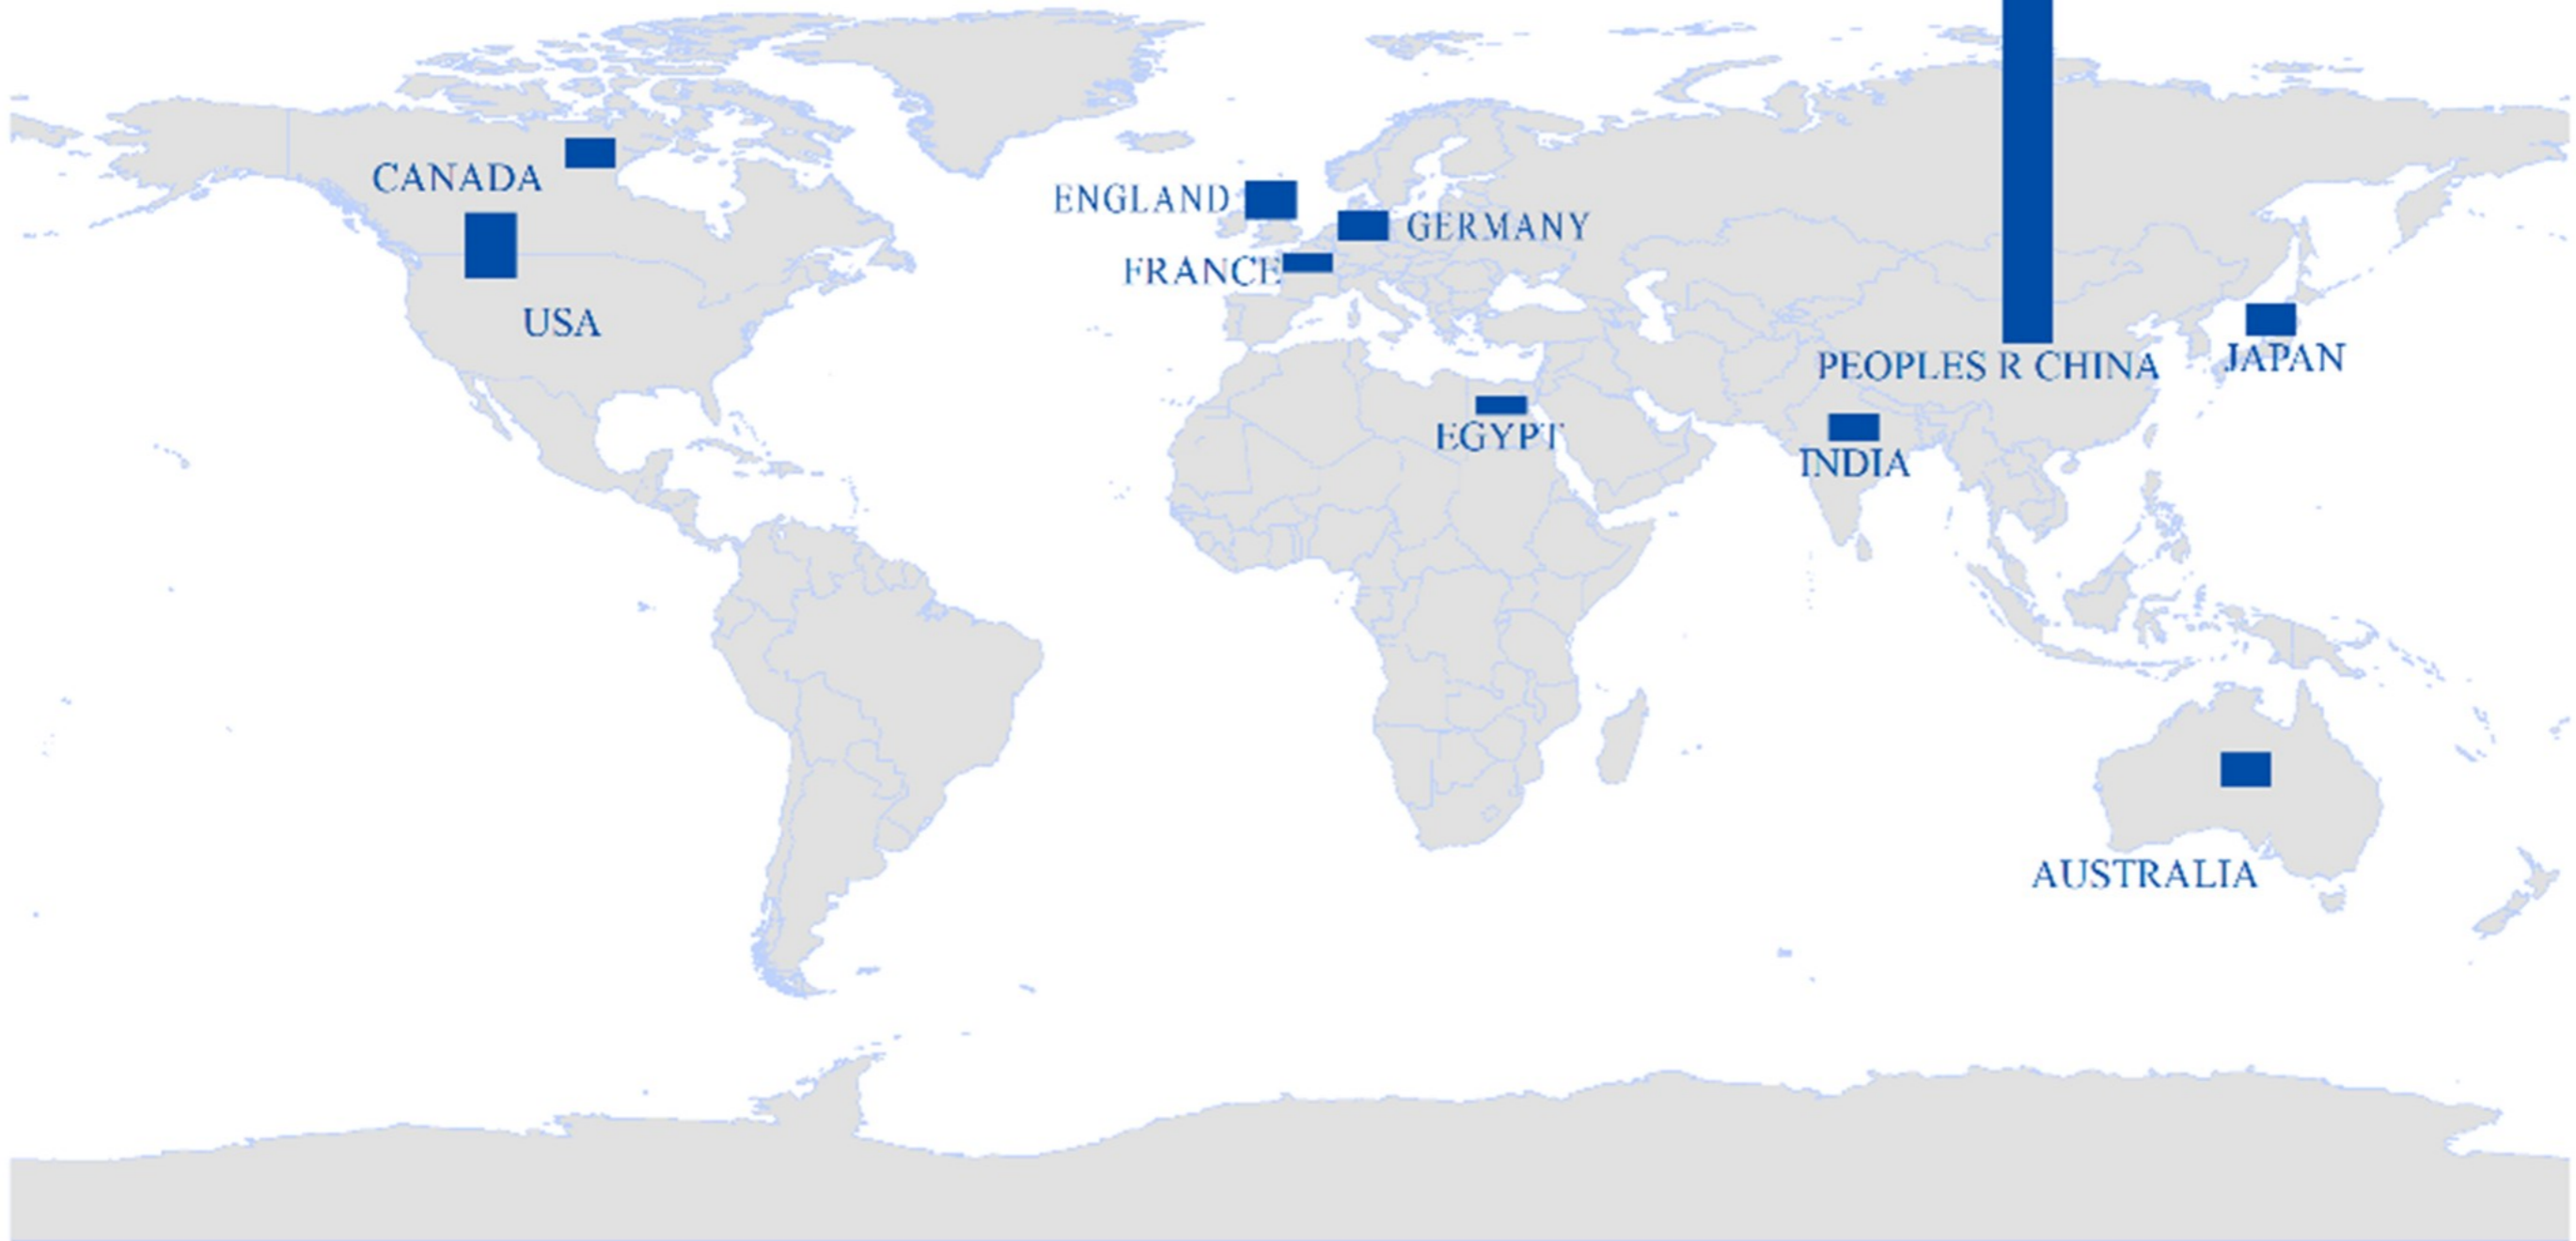



Number of publications per institution (articles)

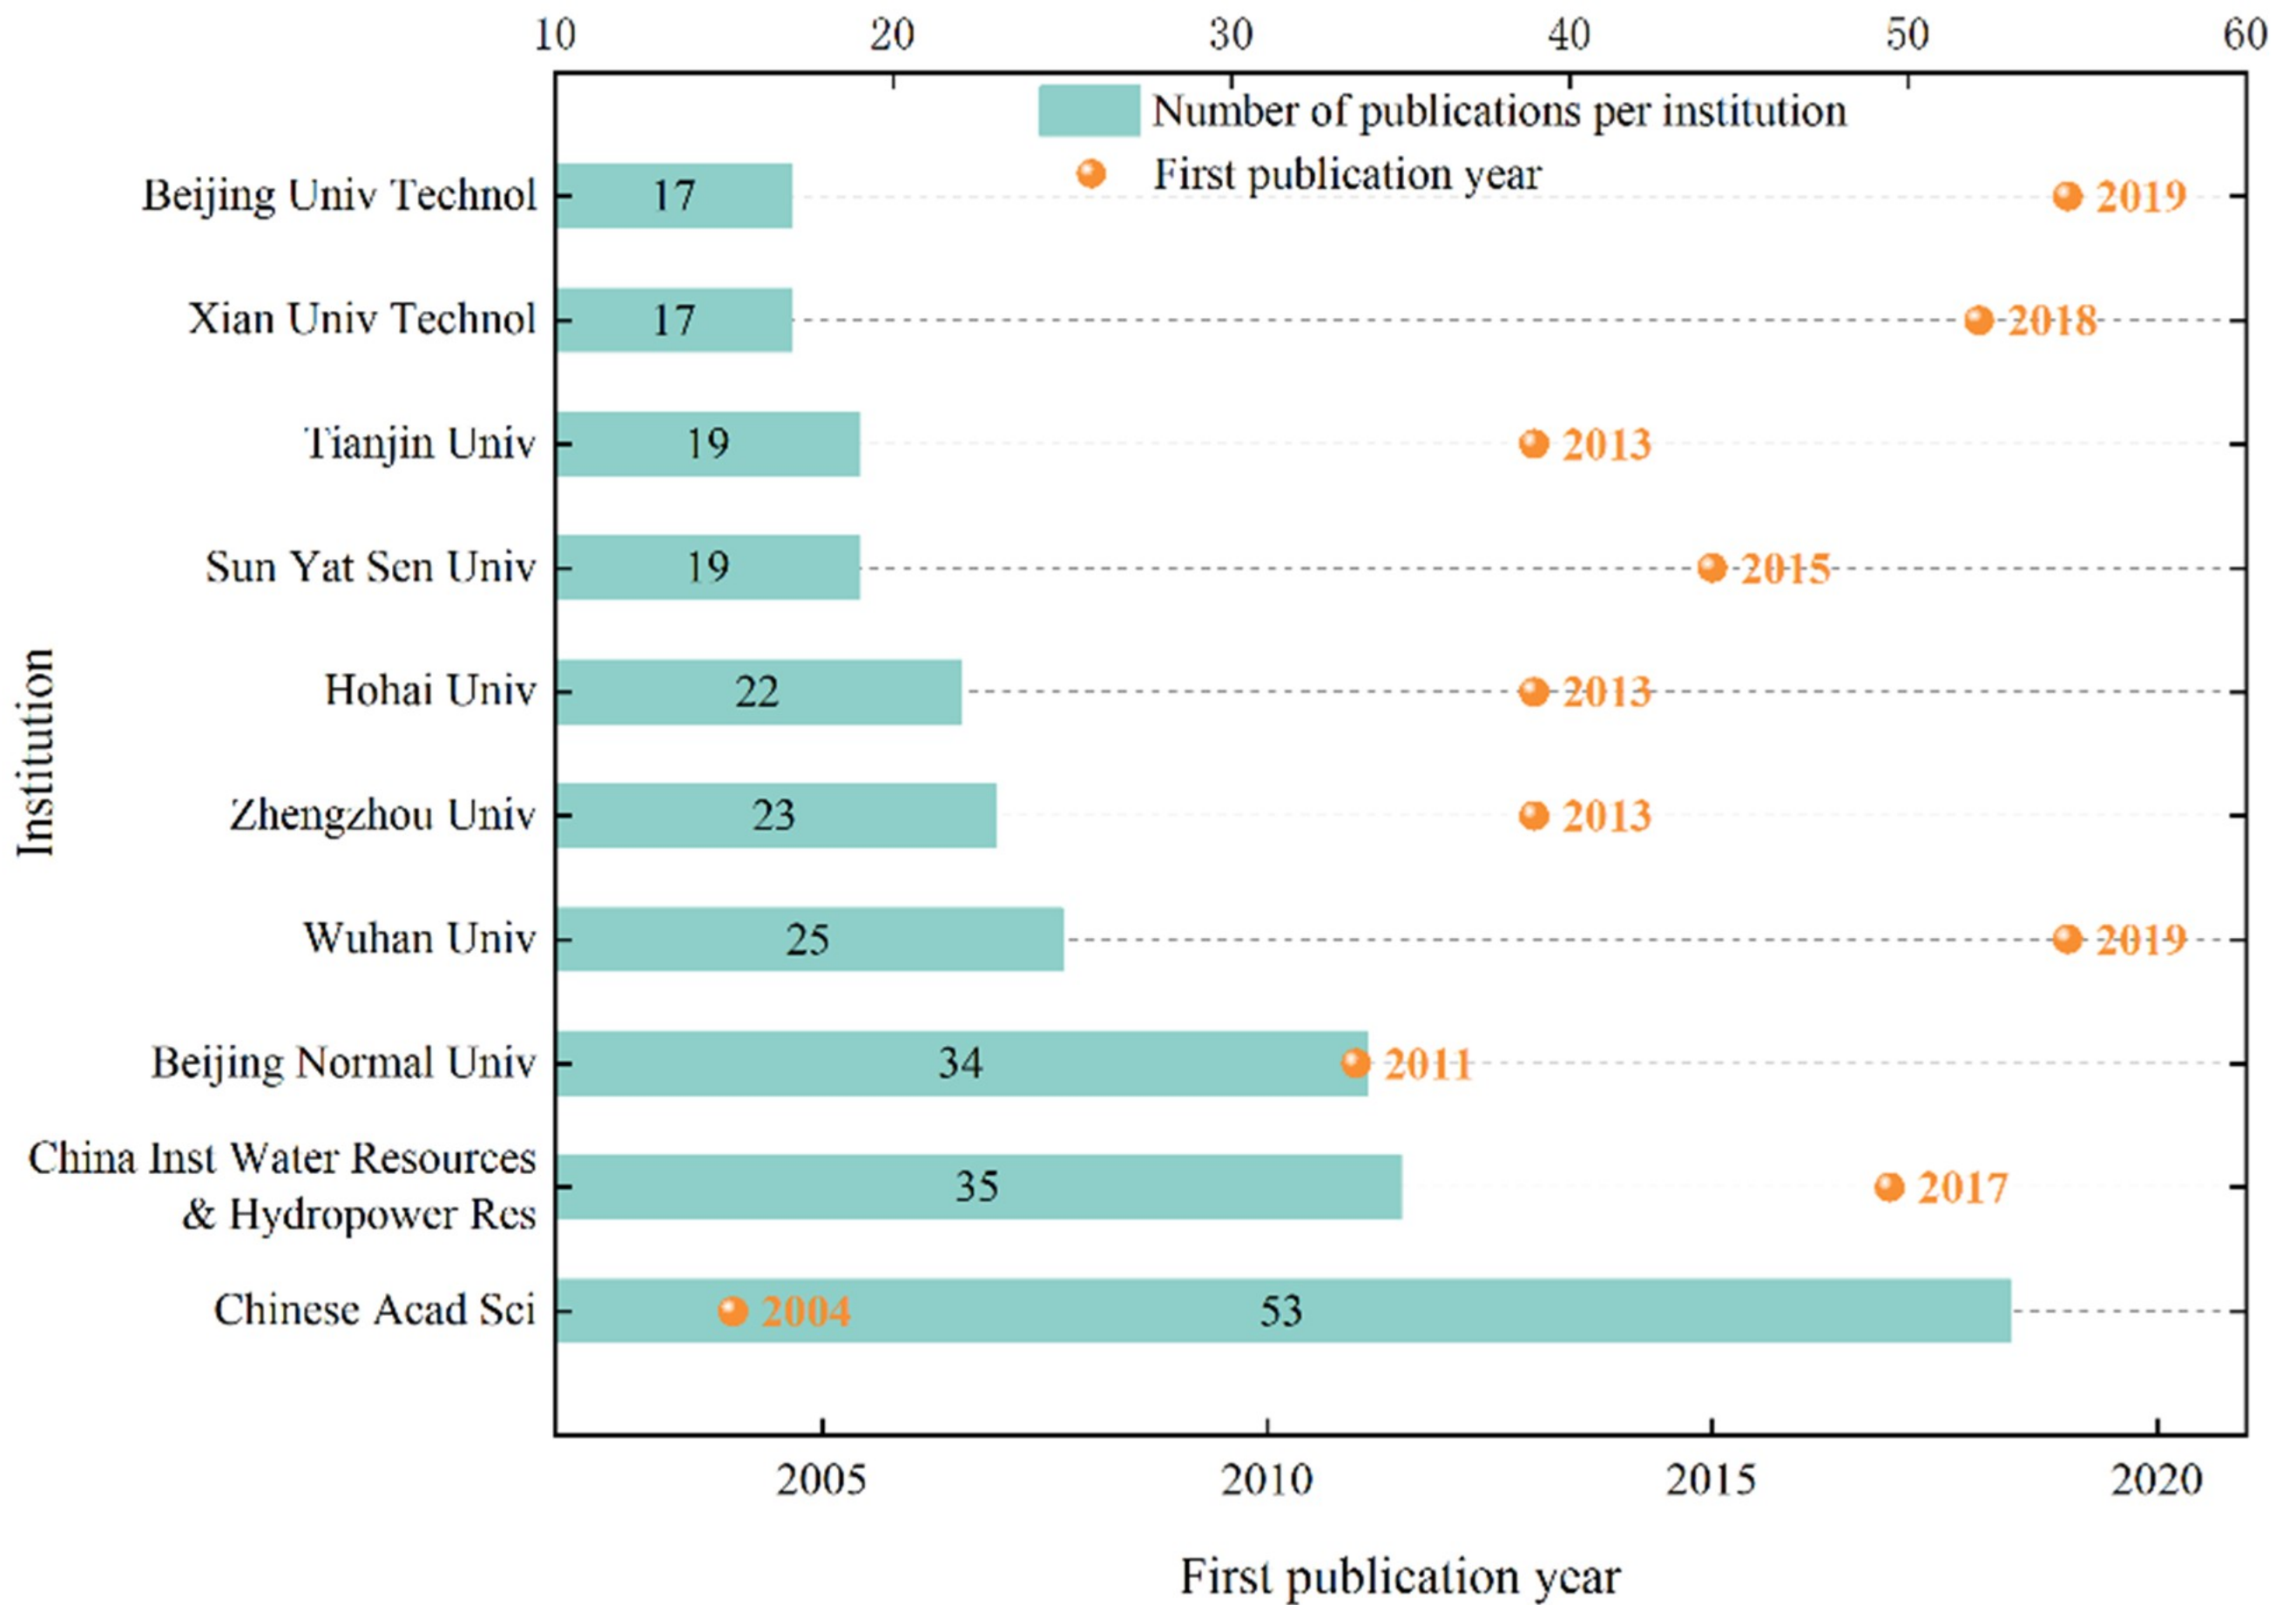

CiteSpace, v. 5.1.R6 (64-bit) Basic  
November 17, 2024 at 2:29:55 PM CST  
WoS: C:\Users\Bucky\Desktop\文献\图\wos\data  
Timespan: 2004-2024 (Slice Length=1)  
Selection Criteria: g-index (k=25), LRF=3.0, LFN=10, LBY=5, c=1.0  
Network: N=560, E=685 (Density=0.0044)  
Largest CC: 14 (2%)  
Nodes Labeled: 1.0%  
Pruning: Pathfinder  
Modularity Q=0.9801  
Weighted Mean Silhouette S=1  
Harmonic Mean(Q, S)=0.9899

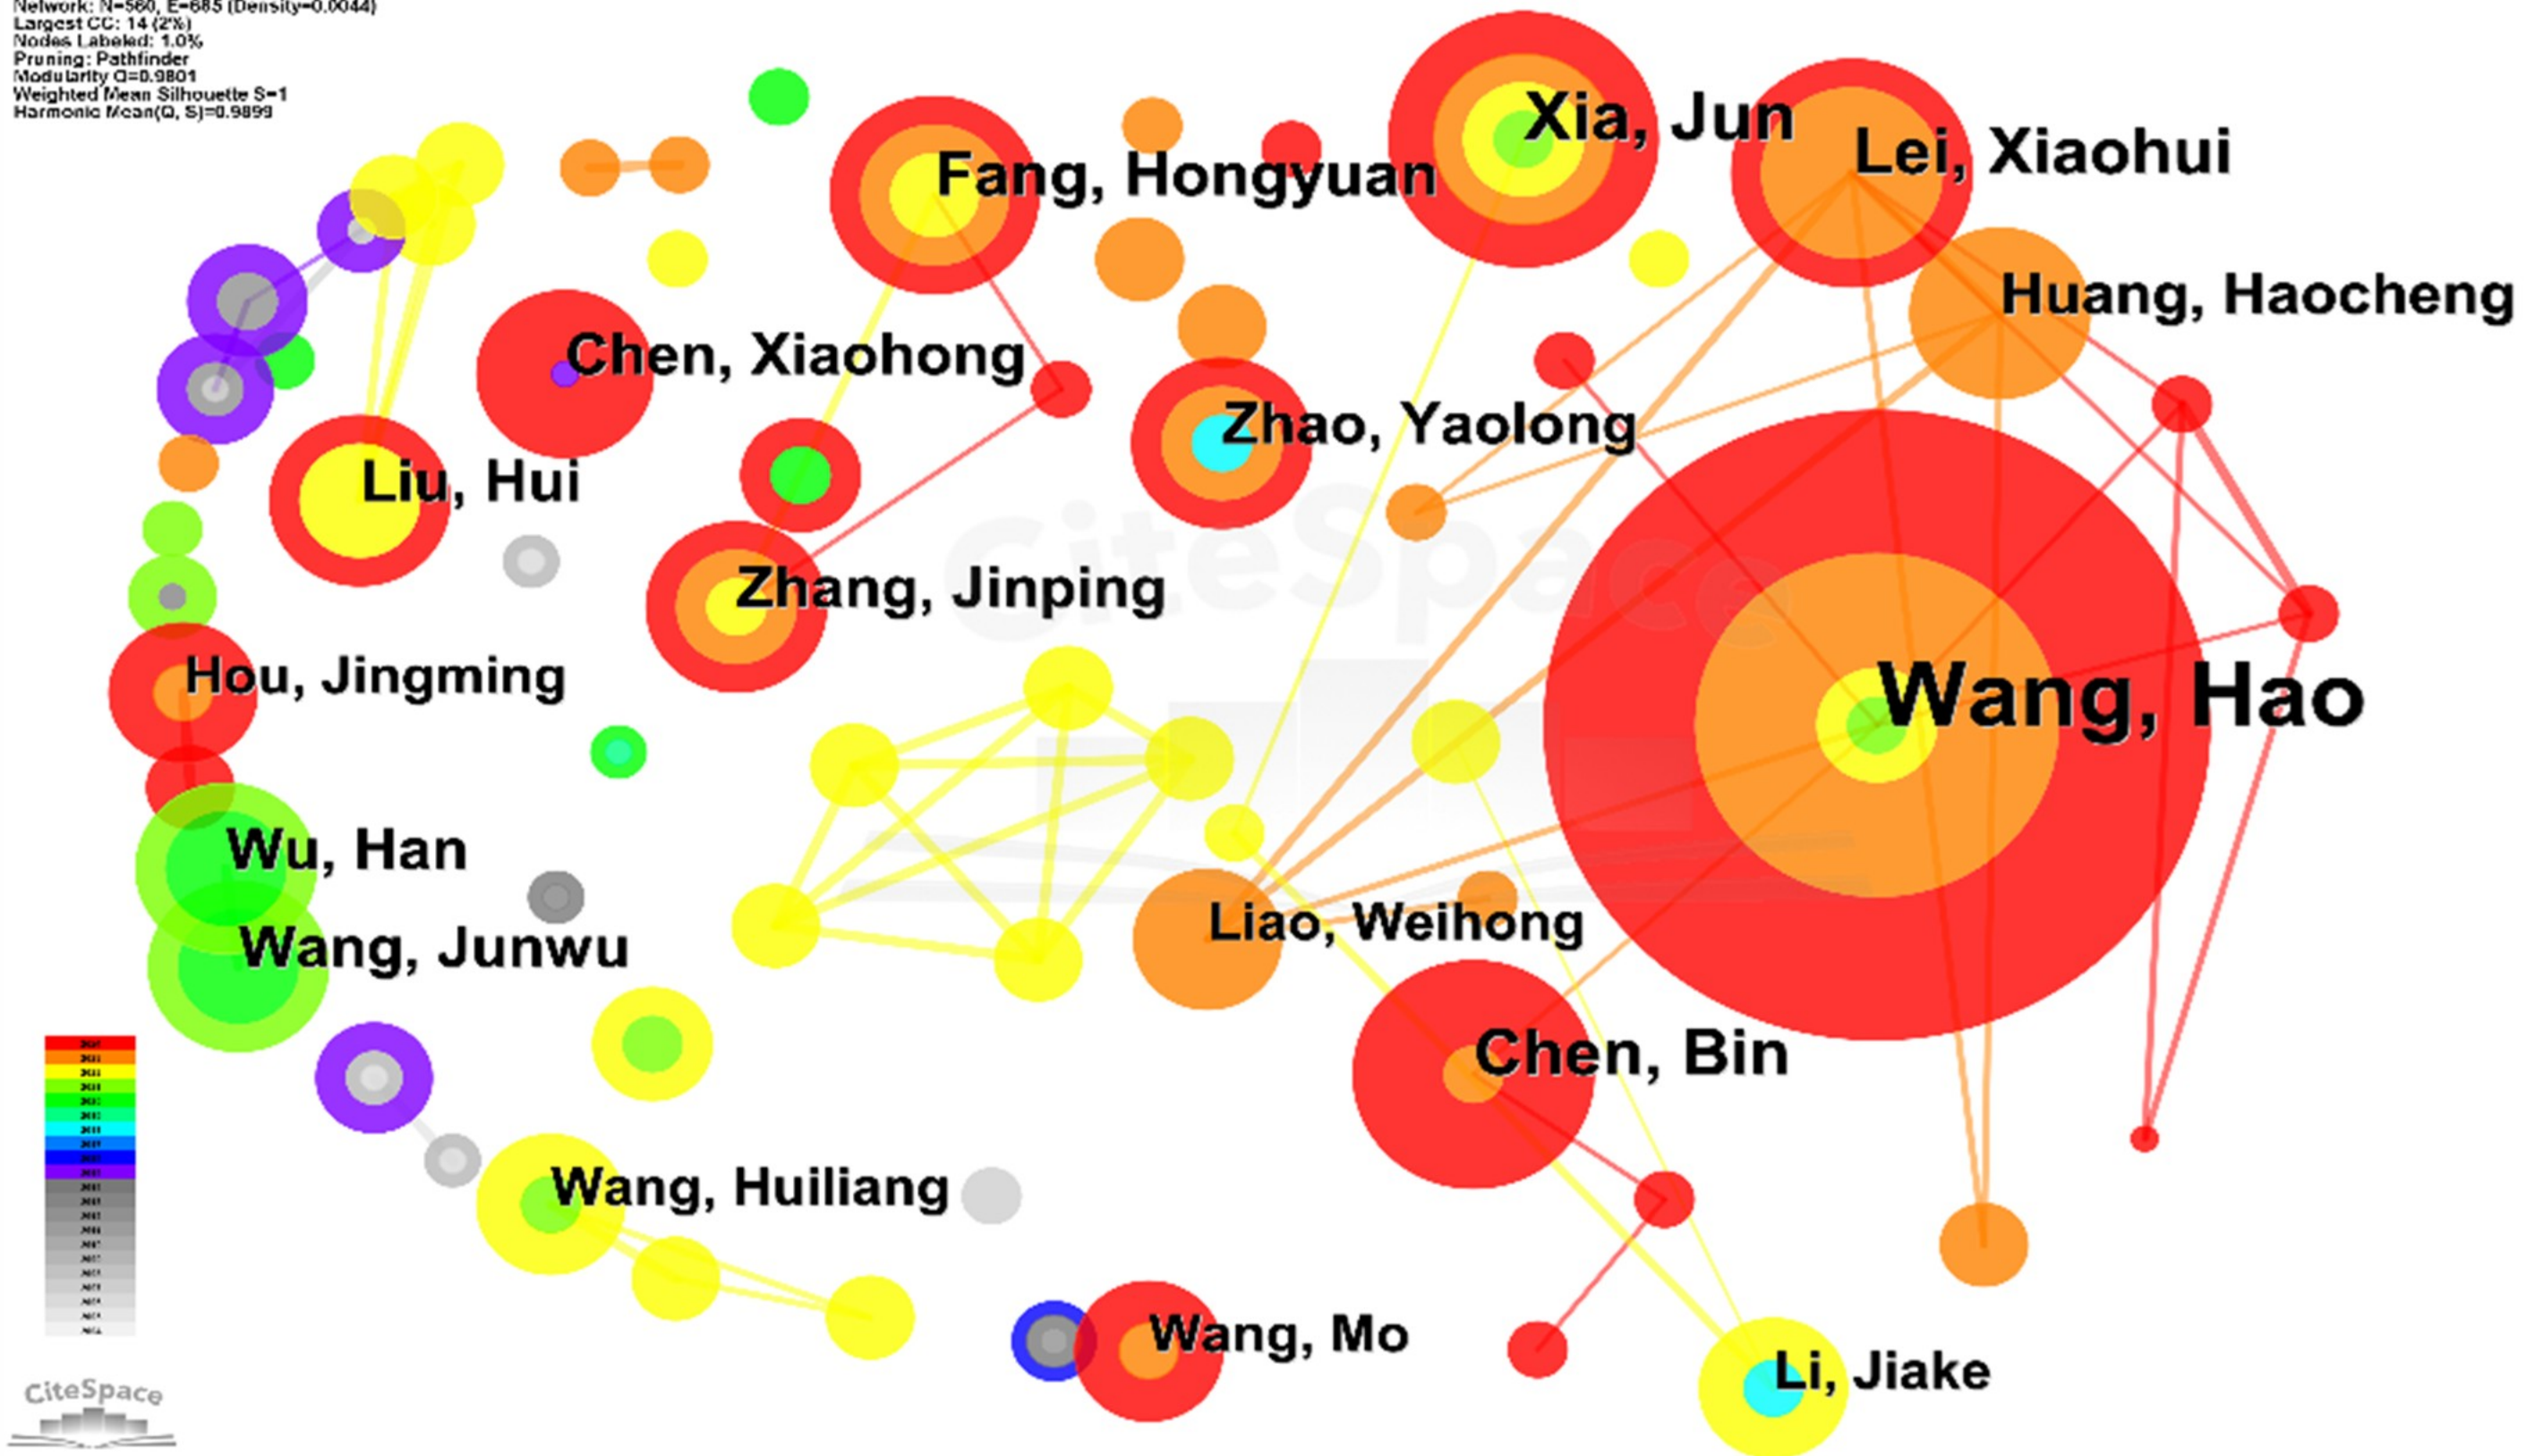

Number of publications per author (articles)

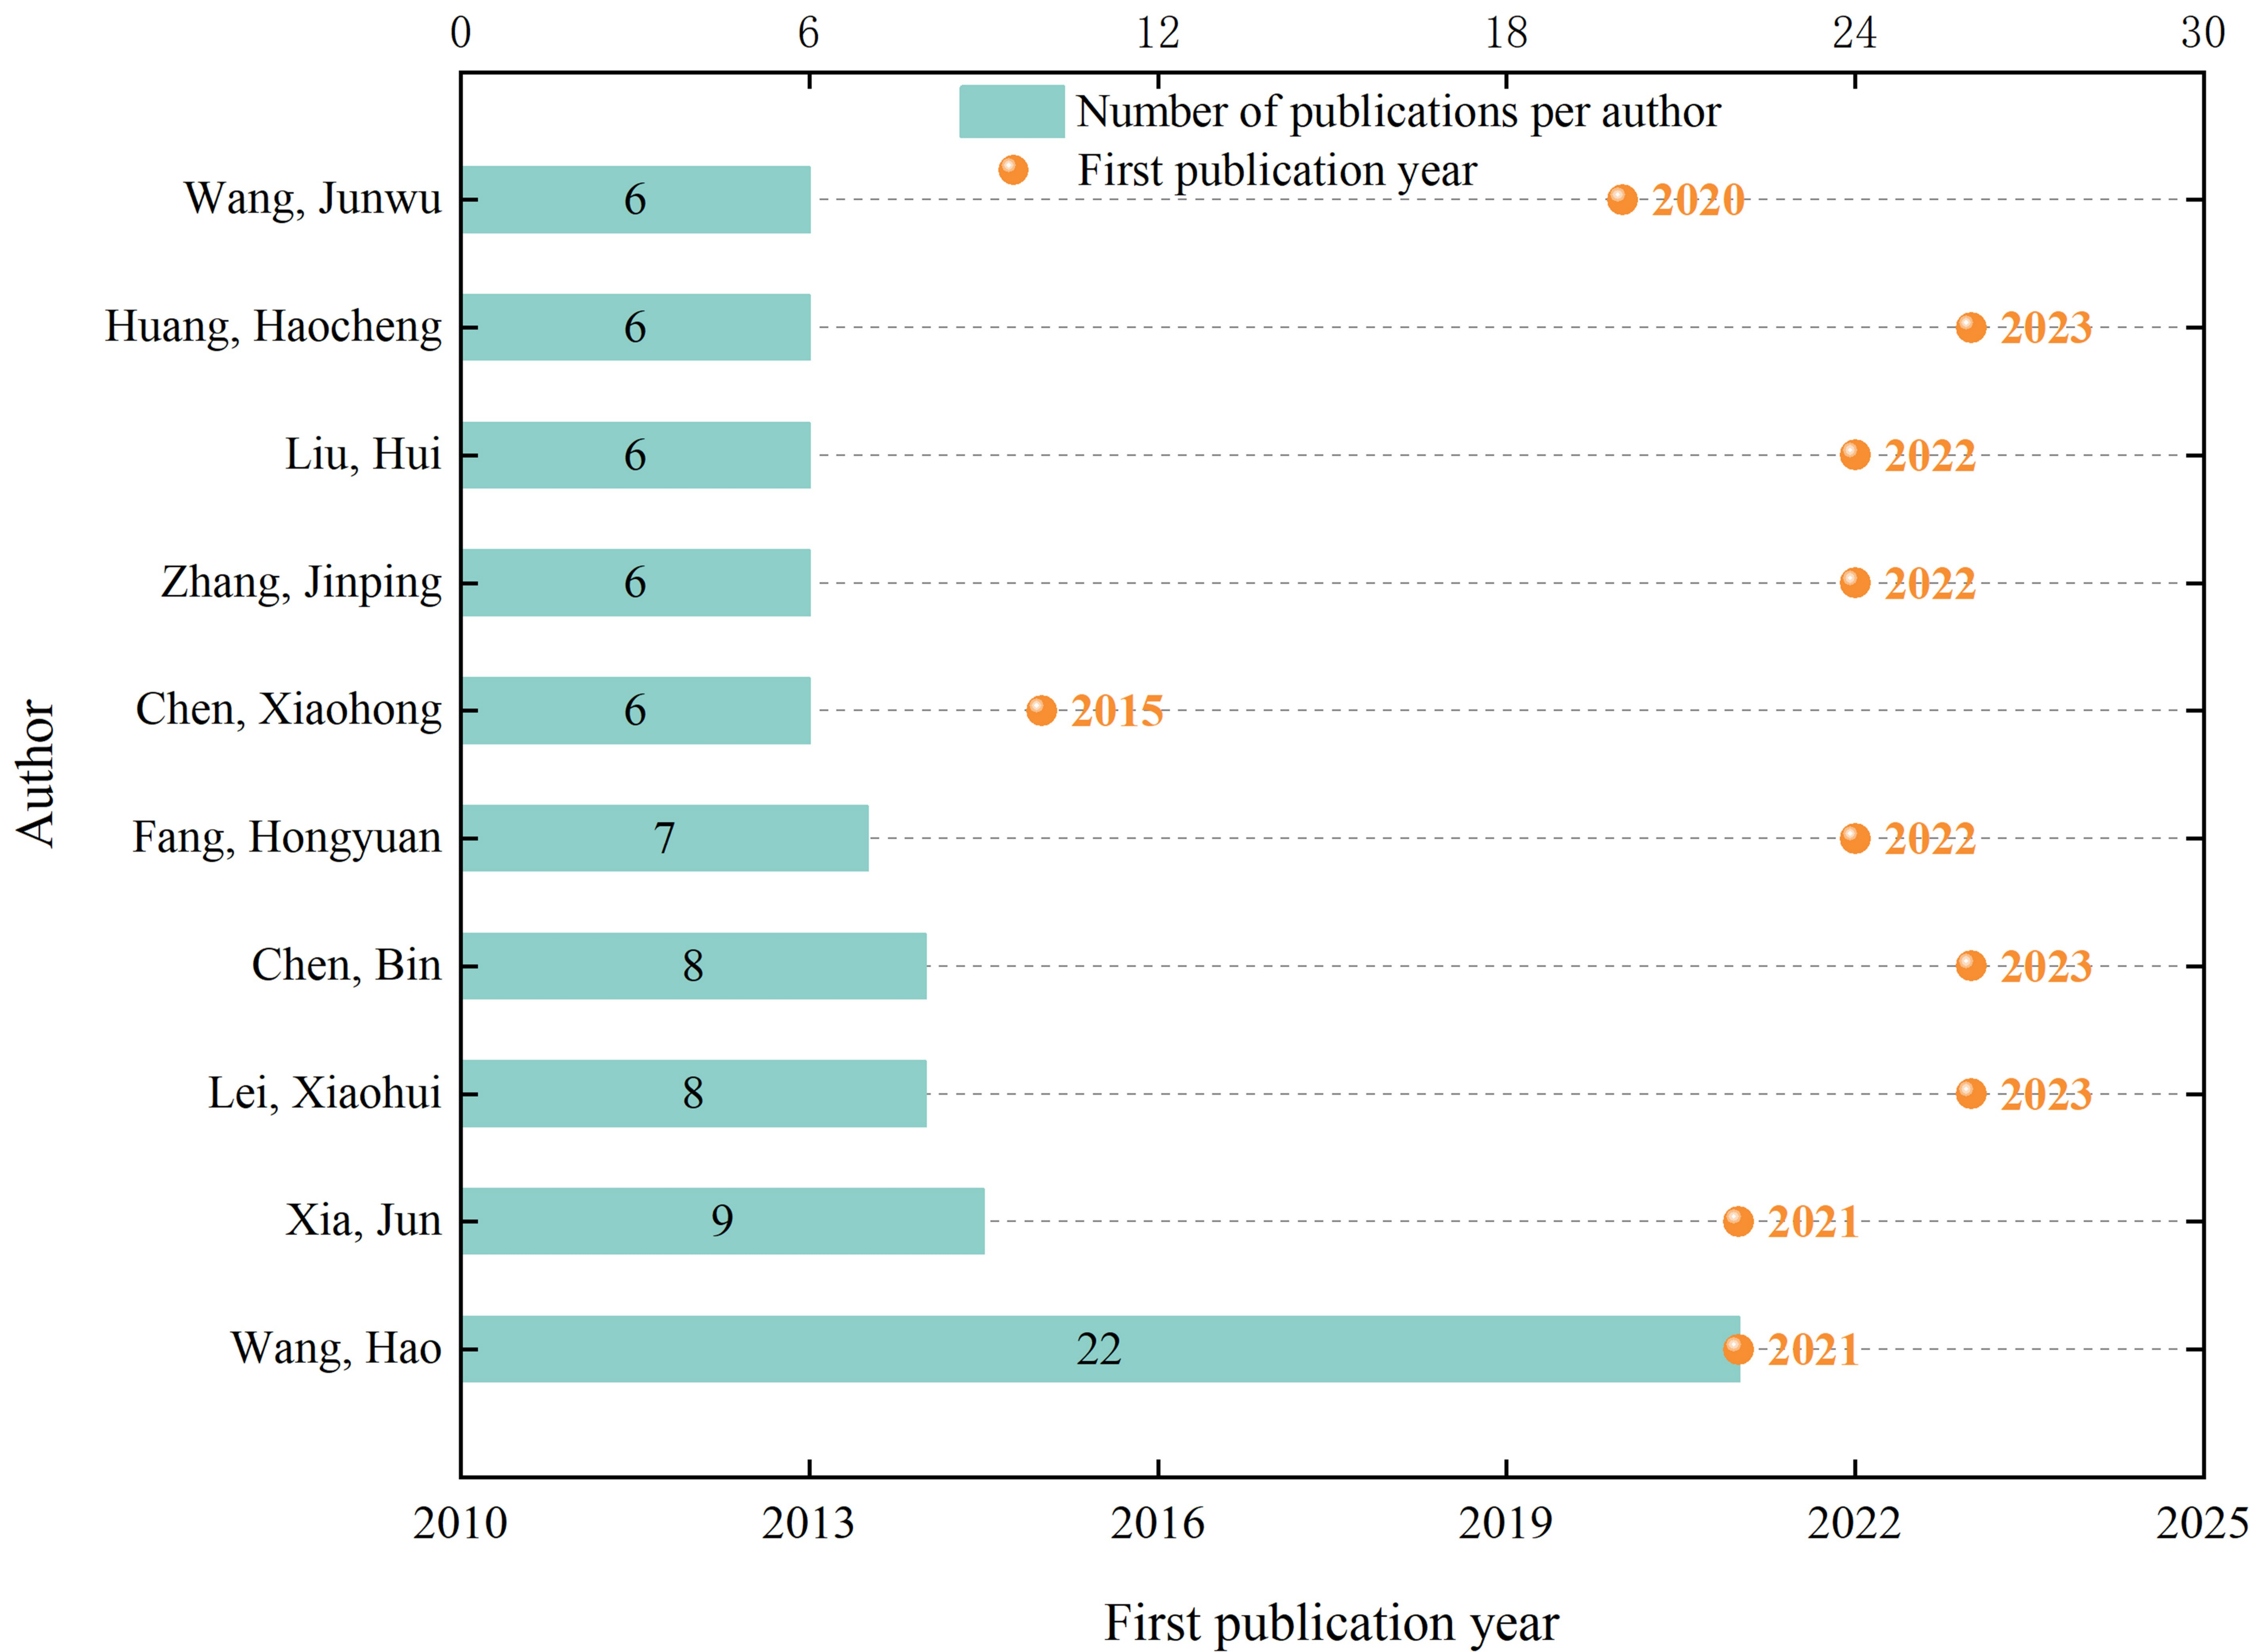

CiteSpace, v. 5.1.R6 (64-bit) Basic  
November 18, 2024 at 2:48:34 PM CST  
WoS: C:\Users\Bucky\Desktop\Web of Science 2222\data  
Timespan: 2004-2024 (Slice Length=1)  
Selection Criteria: g-index (k=25), LRF=3.0, L/N=10, LBY=5, z=1.0  
Network: N=851, E=2388 (Density=0.0066)  
Largest CC: 665 (78%)  
Nodes Labeled: 1.0%  
Pruning: Pathfinder  
Modularity Q=0.794  
Weighted Mean Silhouette S=0.9011  
Harmonic Mean(Q, S)=0.8441

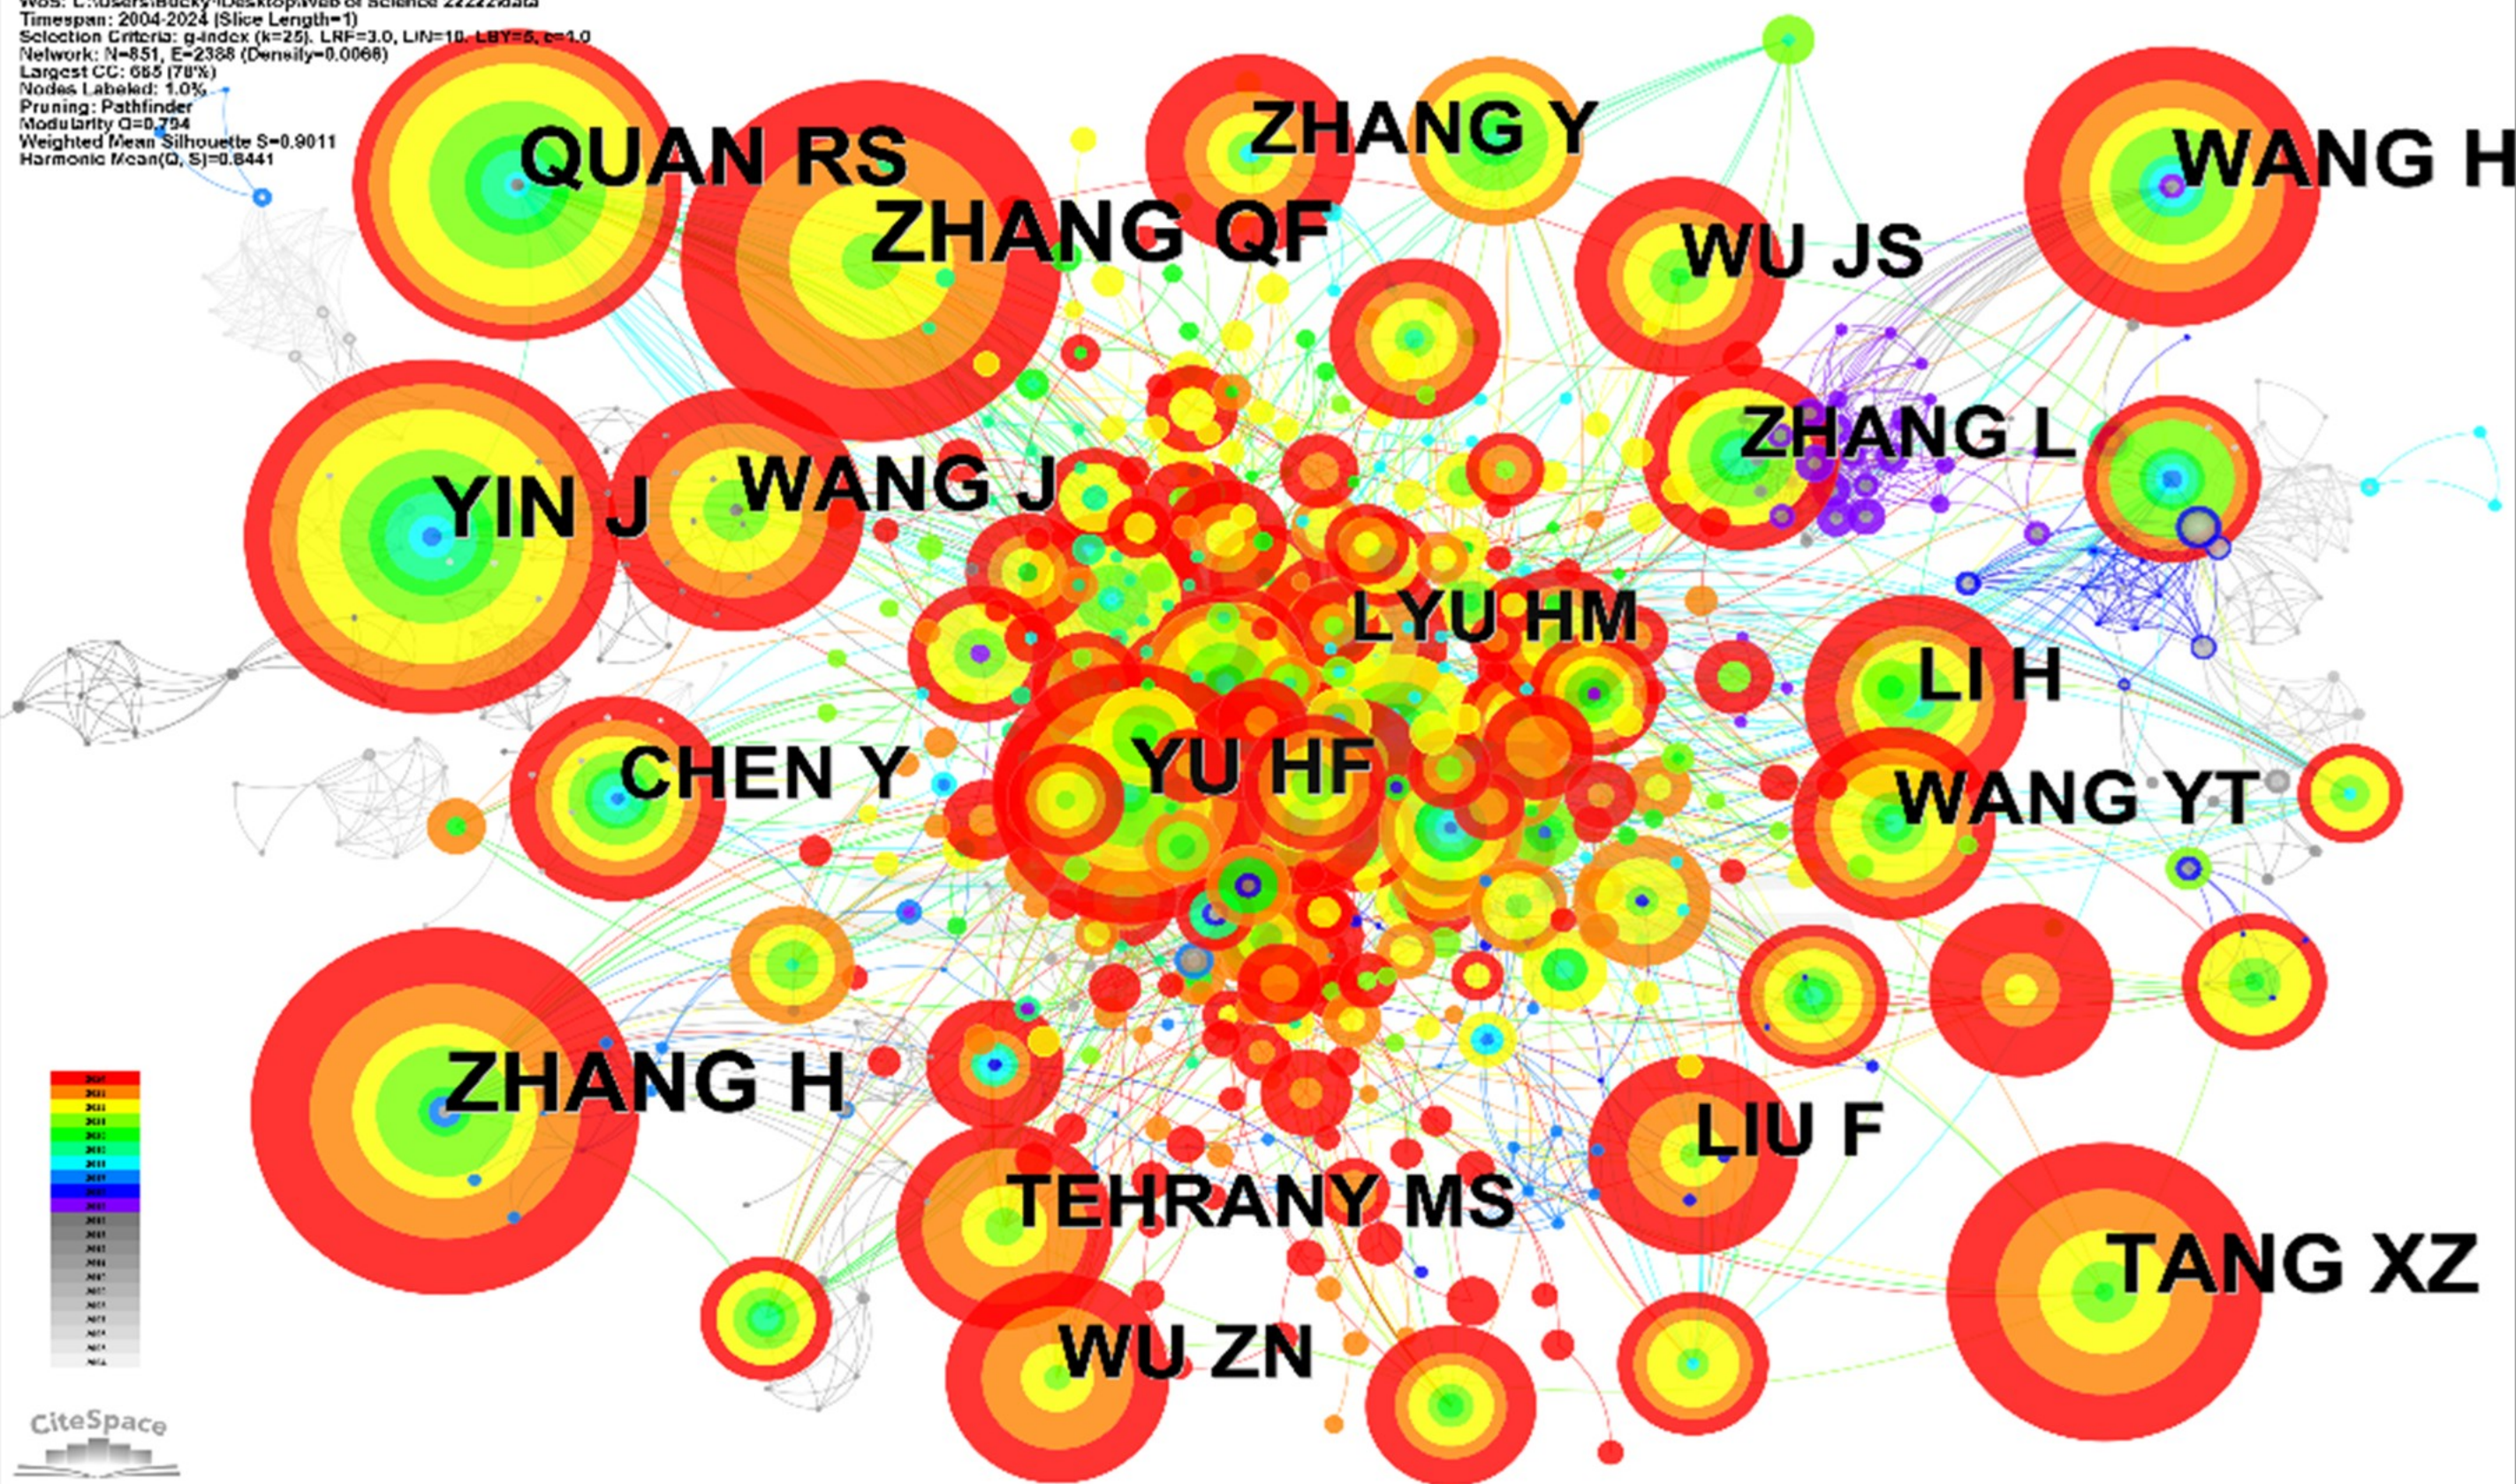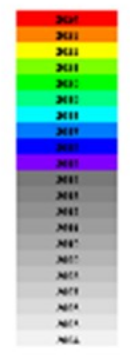

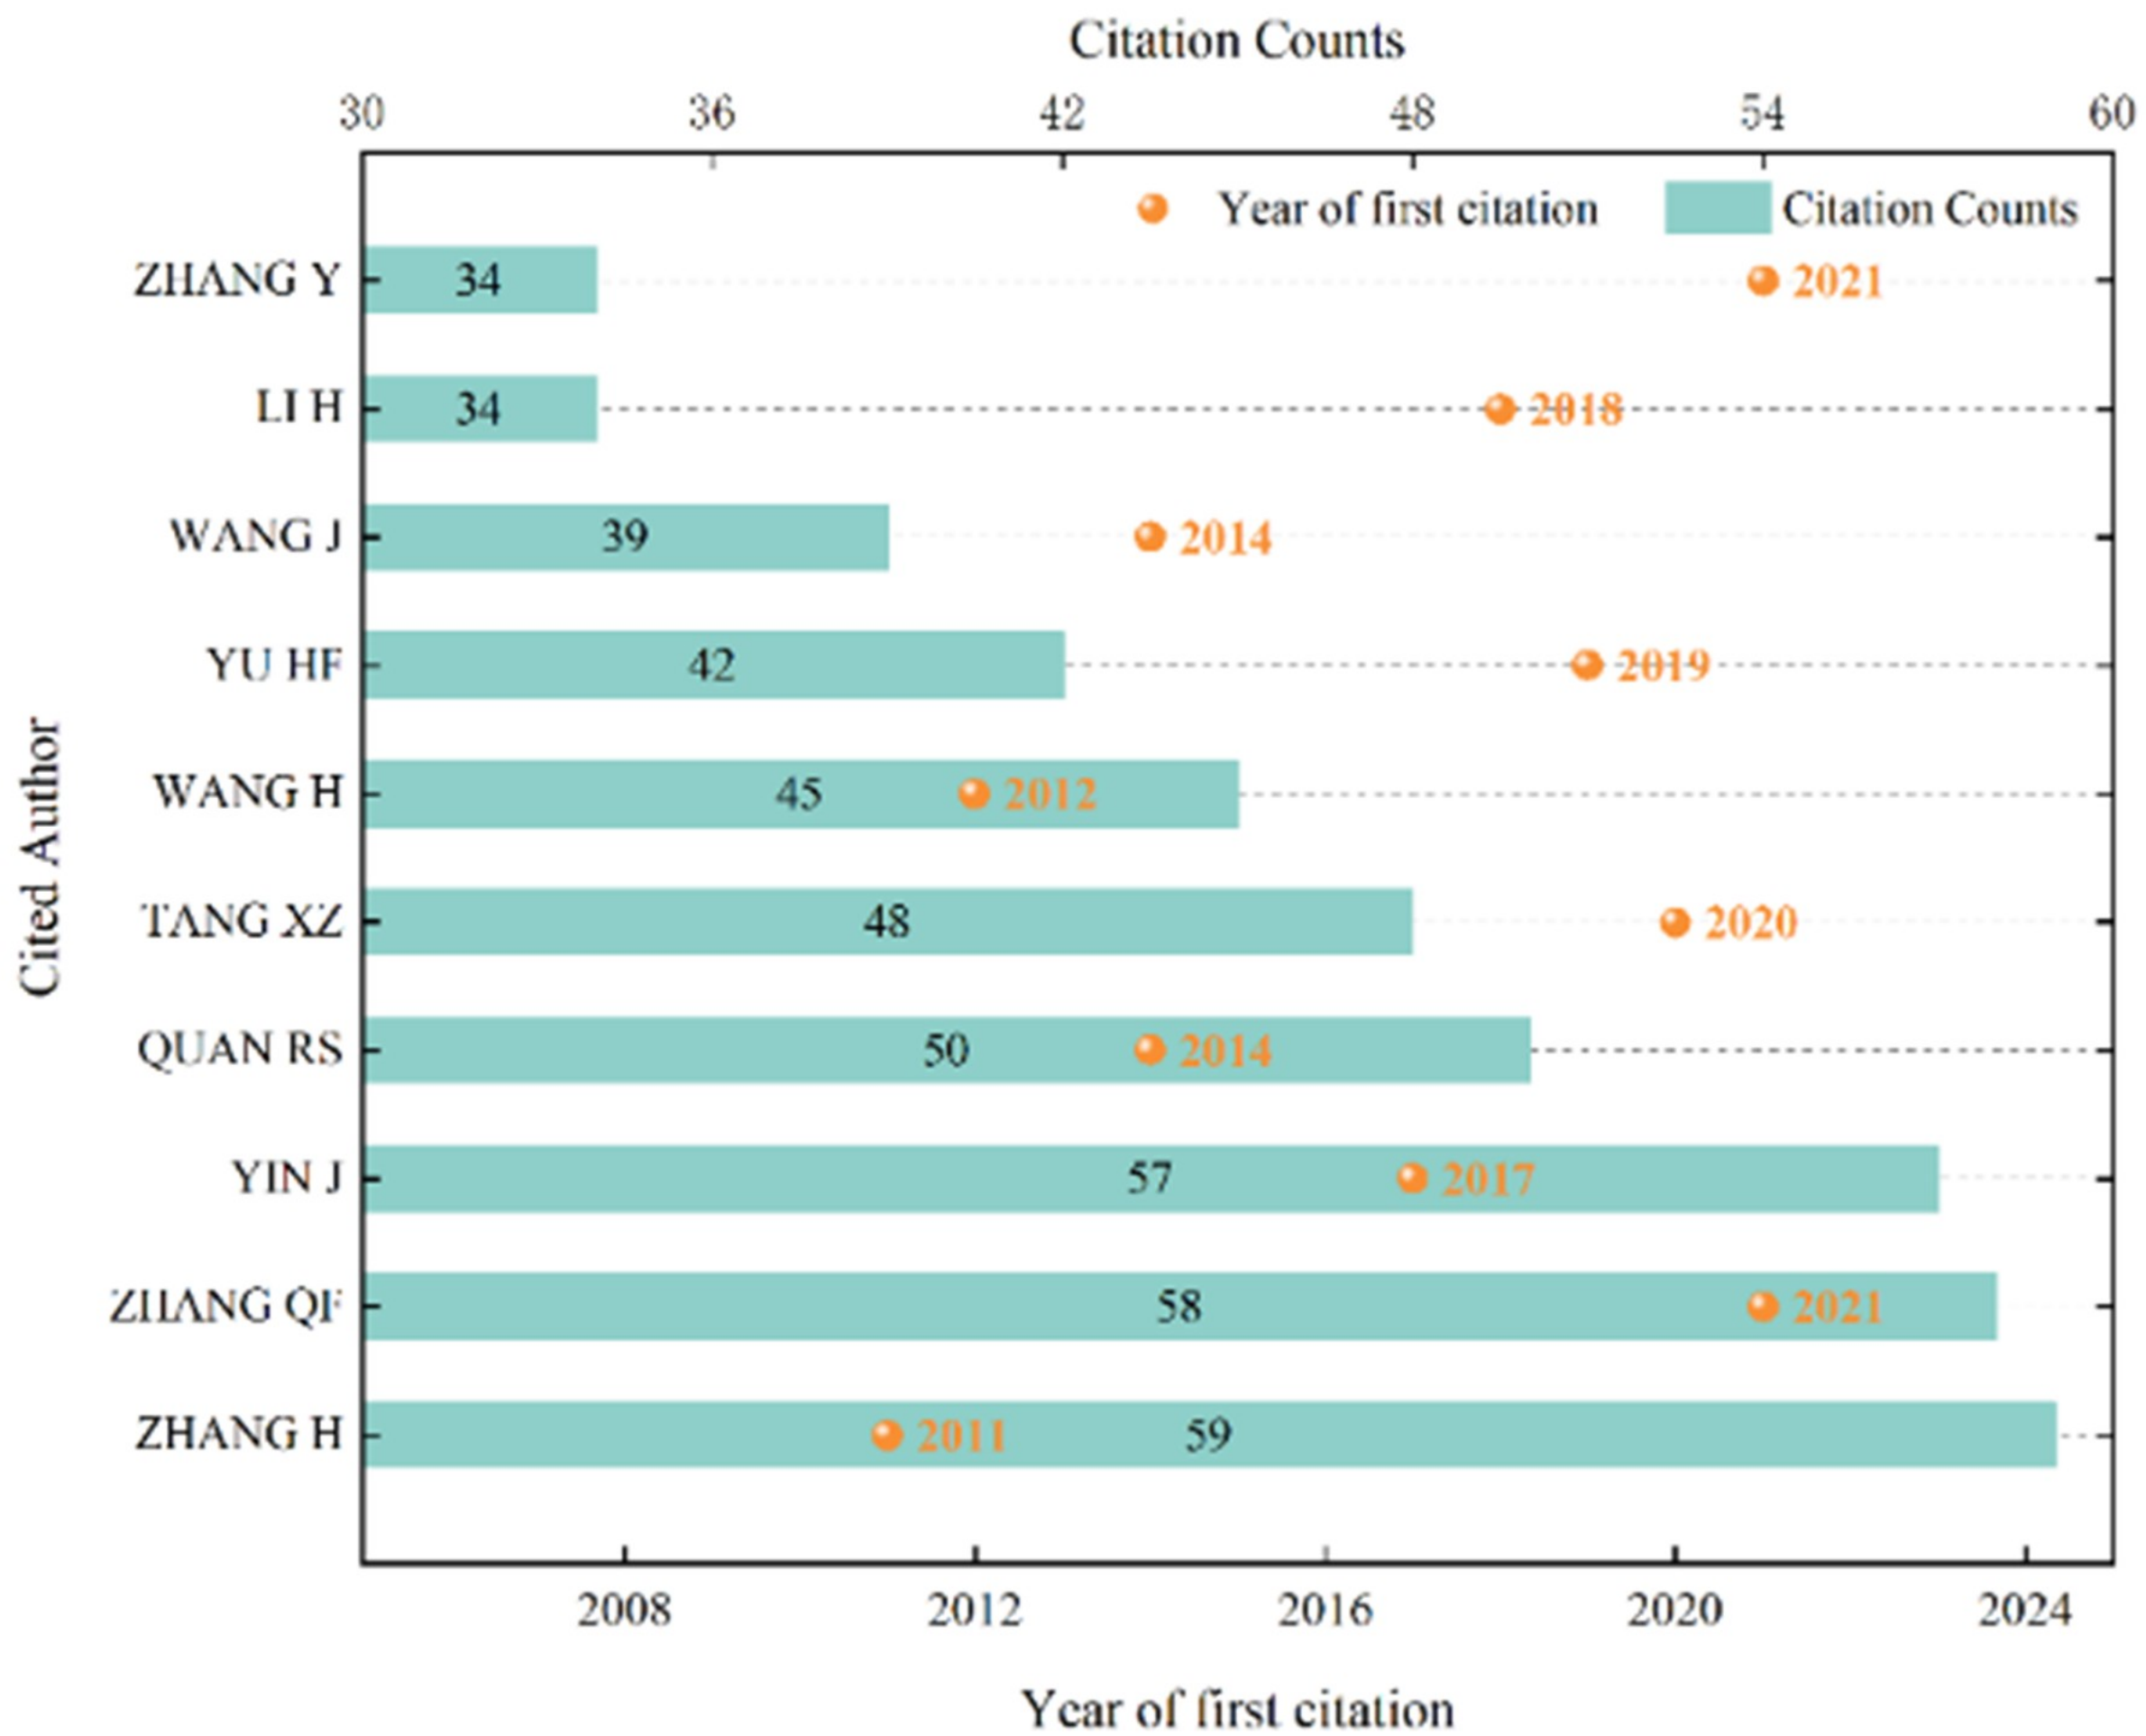

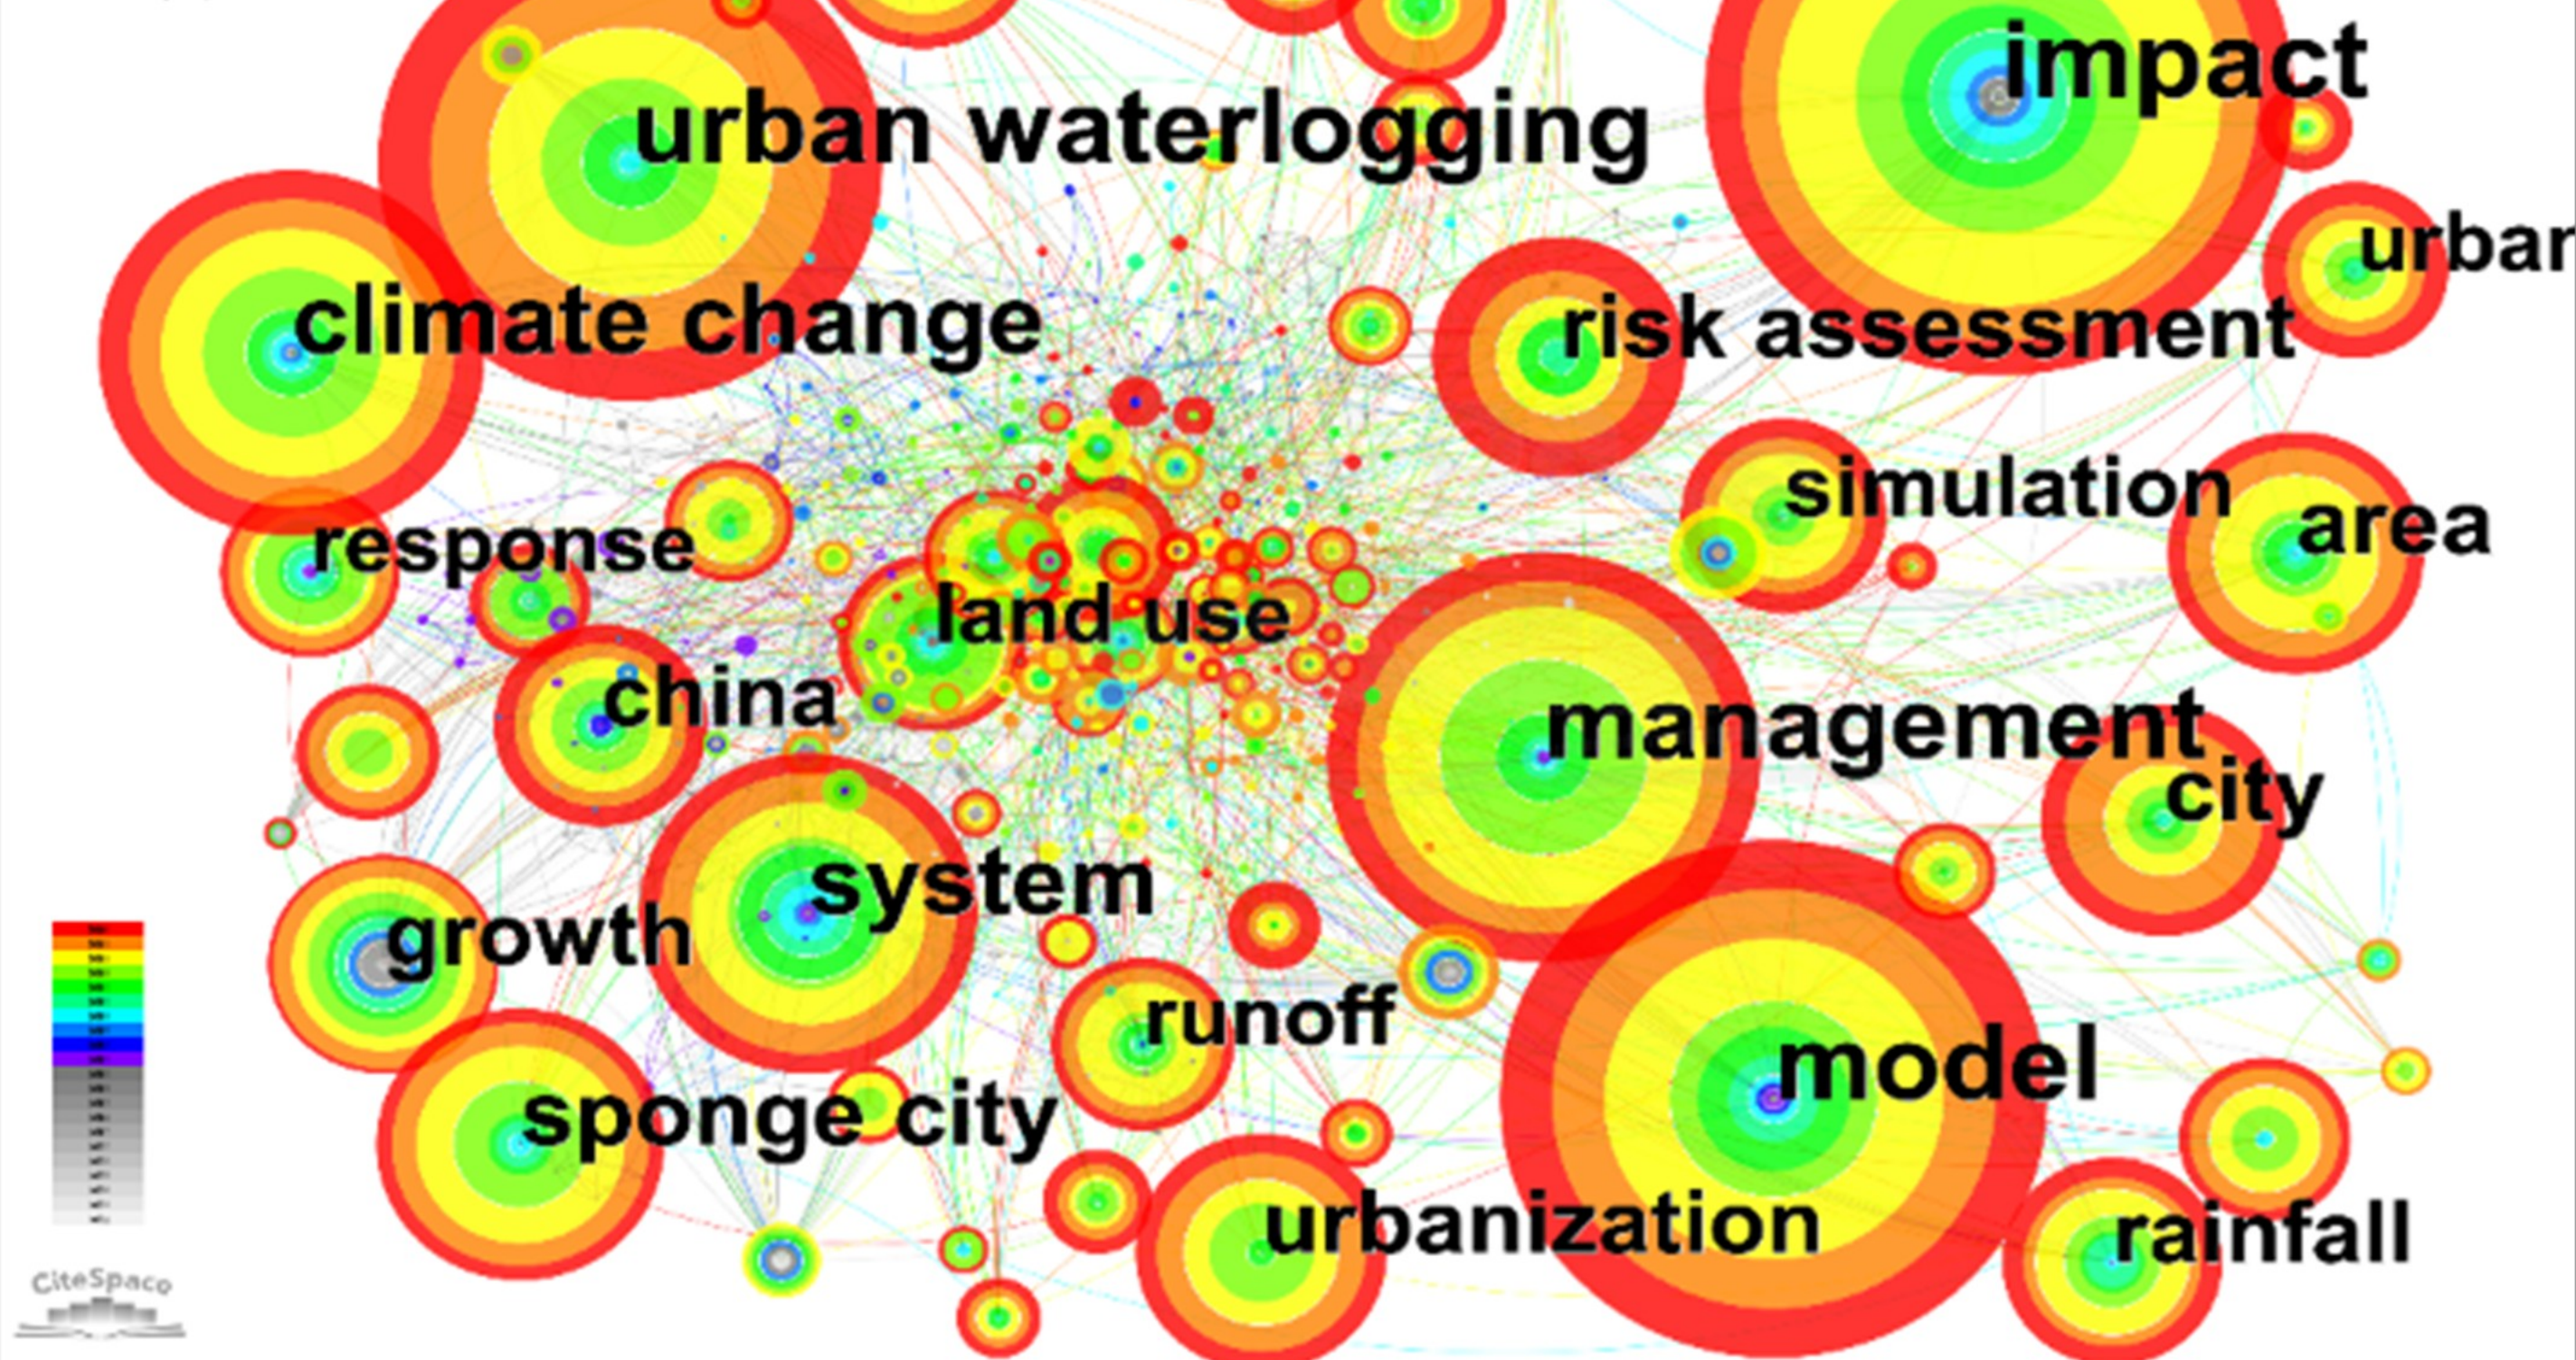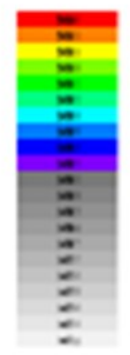

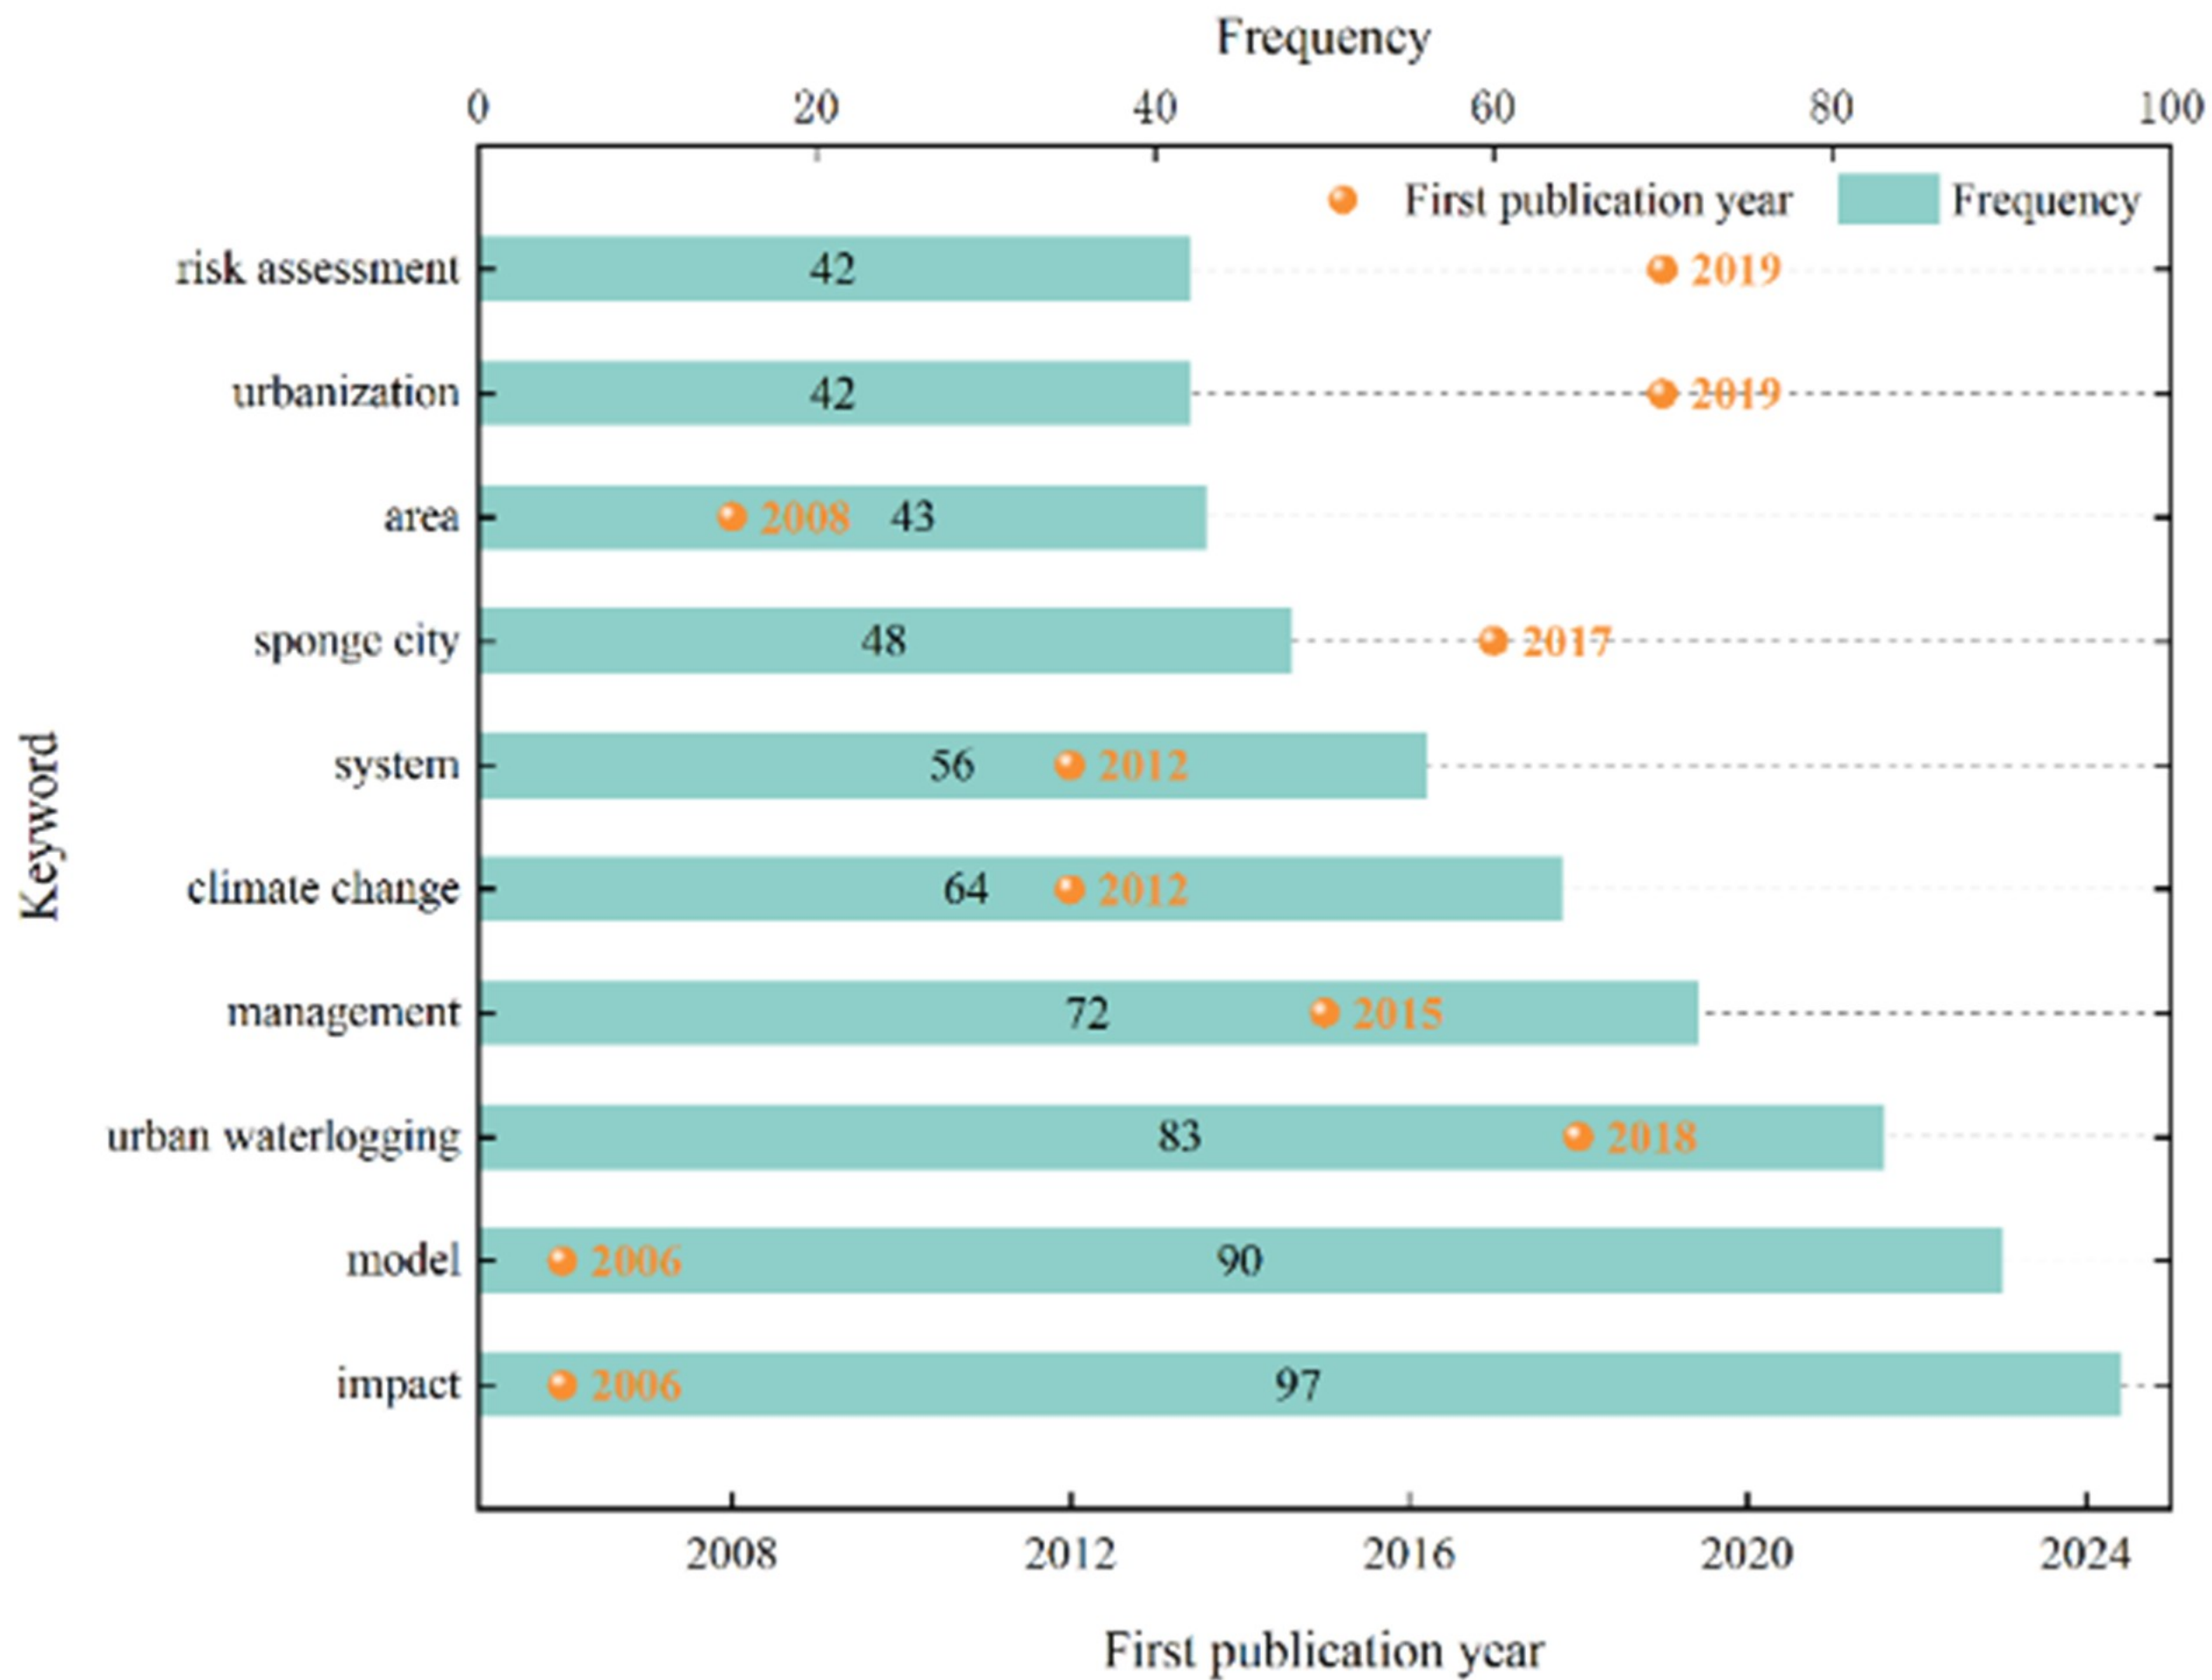



2010 2015 2020 2024

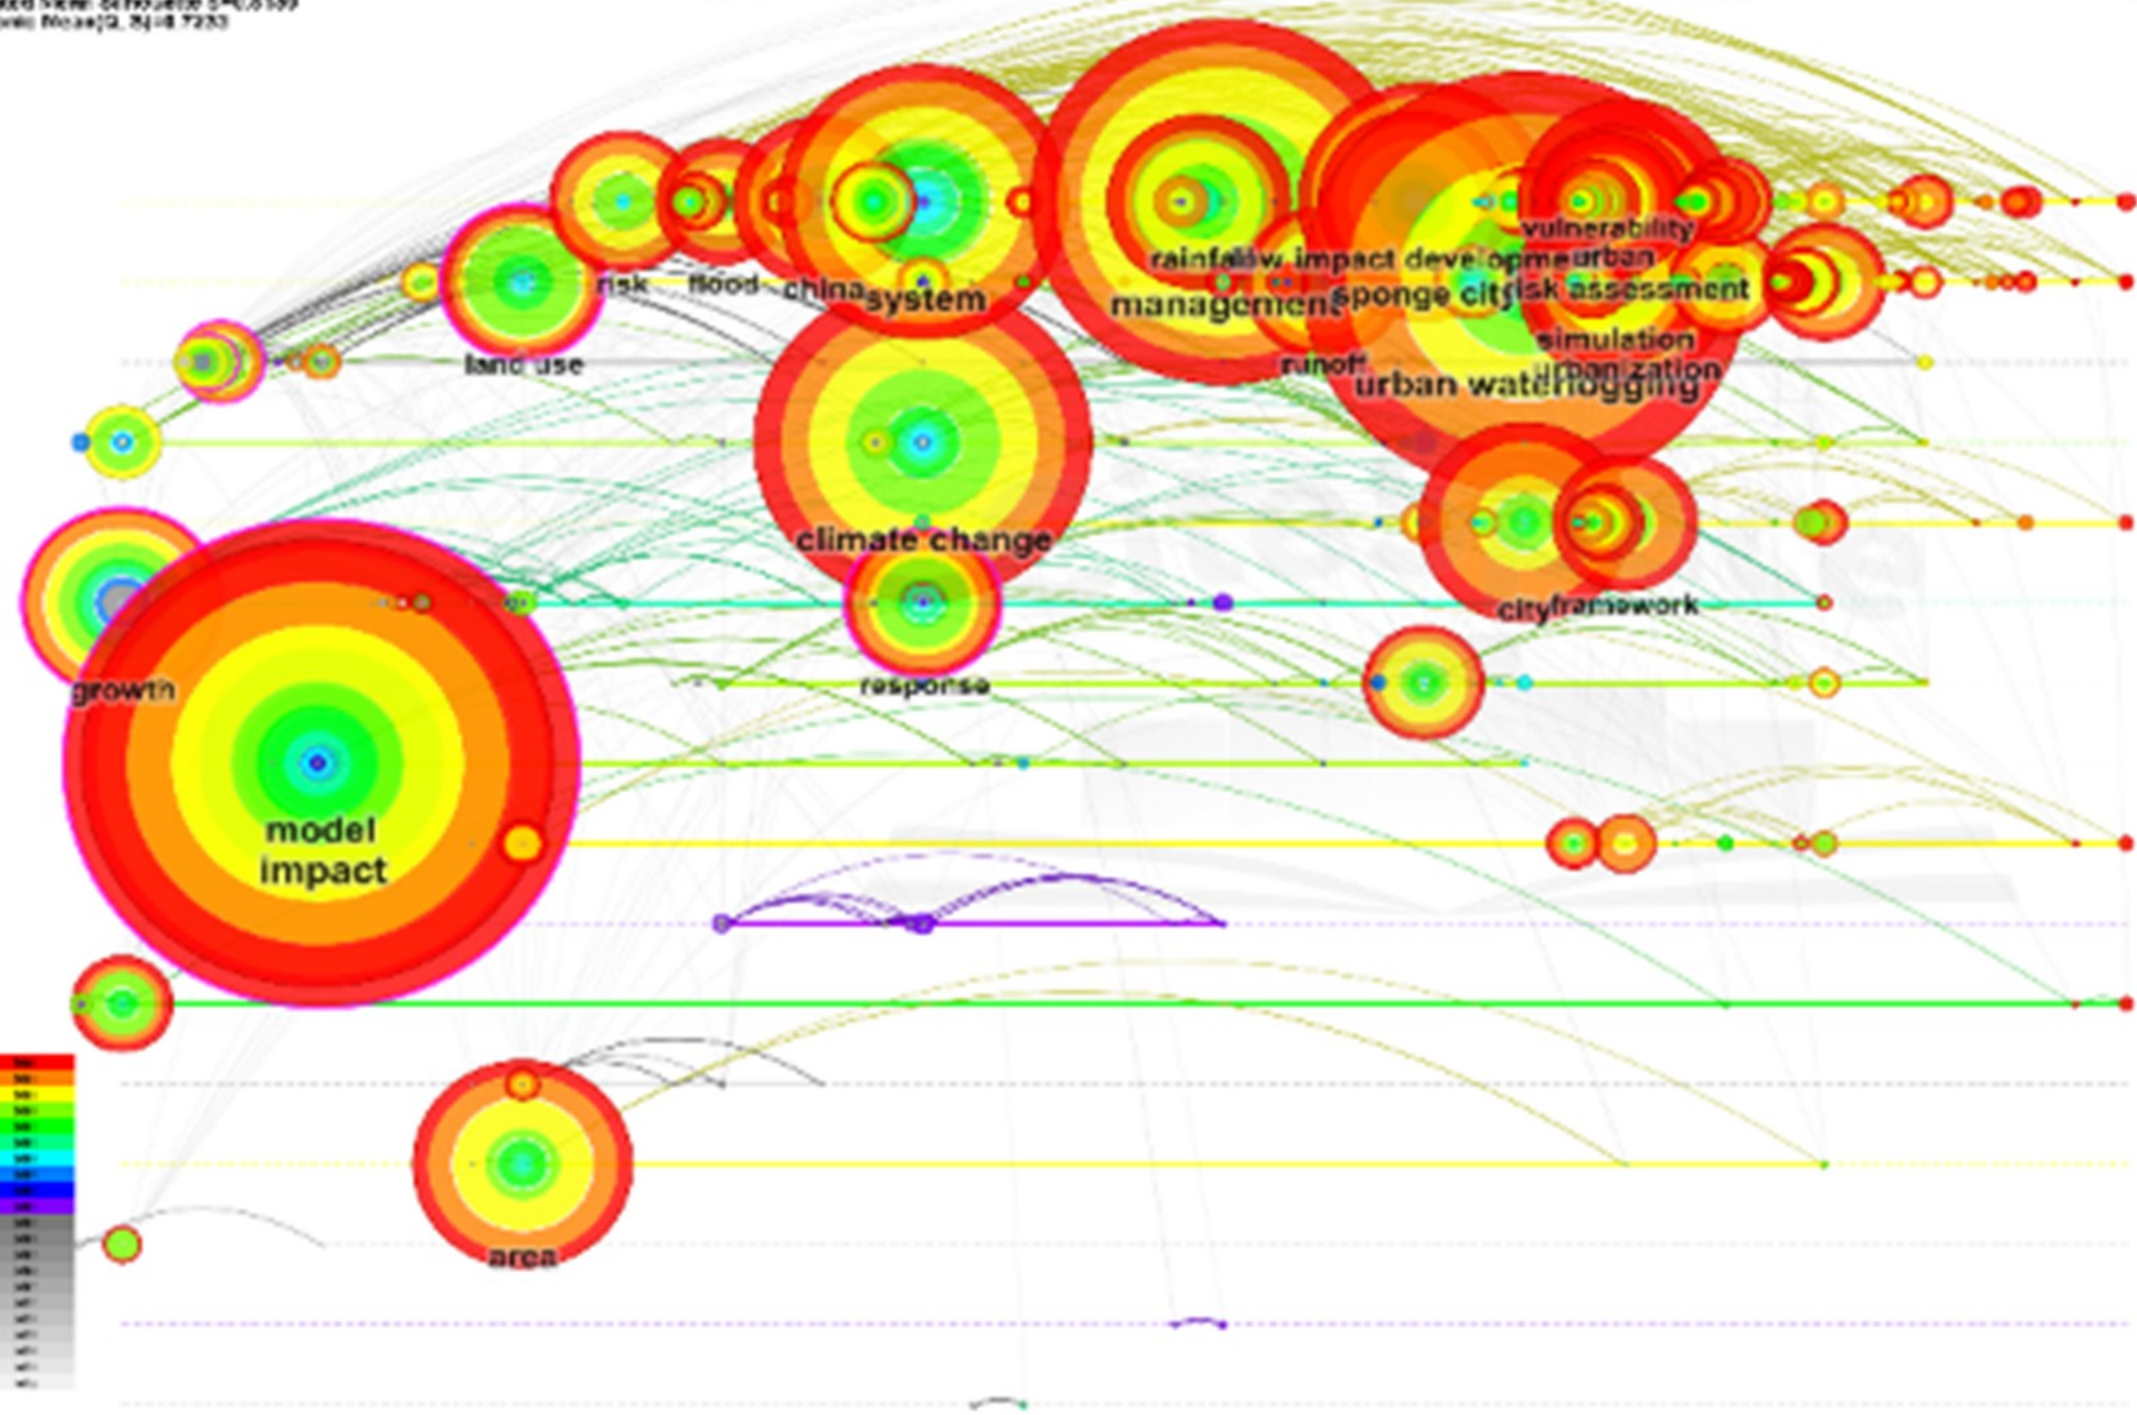

- #0 sponge city
- #1 driving factor
- #2 xylem vulnerabil...
- #3 flooding toleran...
- #4 guangzhou china
- #5 true mangrove sp...
- #6 different water ...
- #7 numerical study
- #8 waterlogged peat...
- #9 rice
- #10 peat soil
- #11 aphid-induced gl...
- #13 periglacial geoa...
- #14 rice-wheat rotat...
- #15 crop residue man...
- #18 sponge gourd asc..

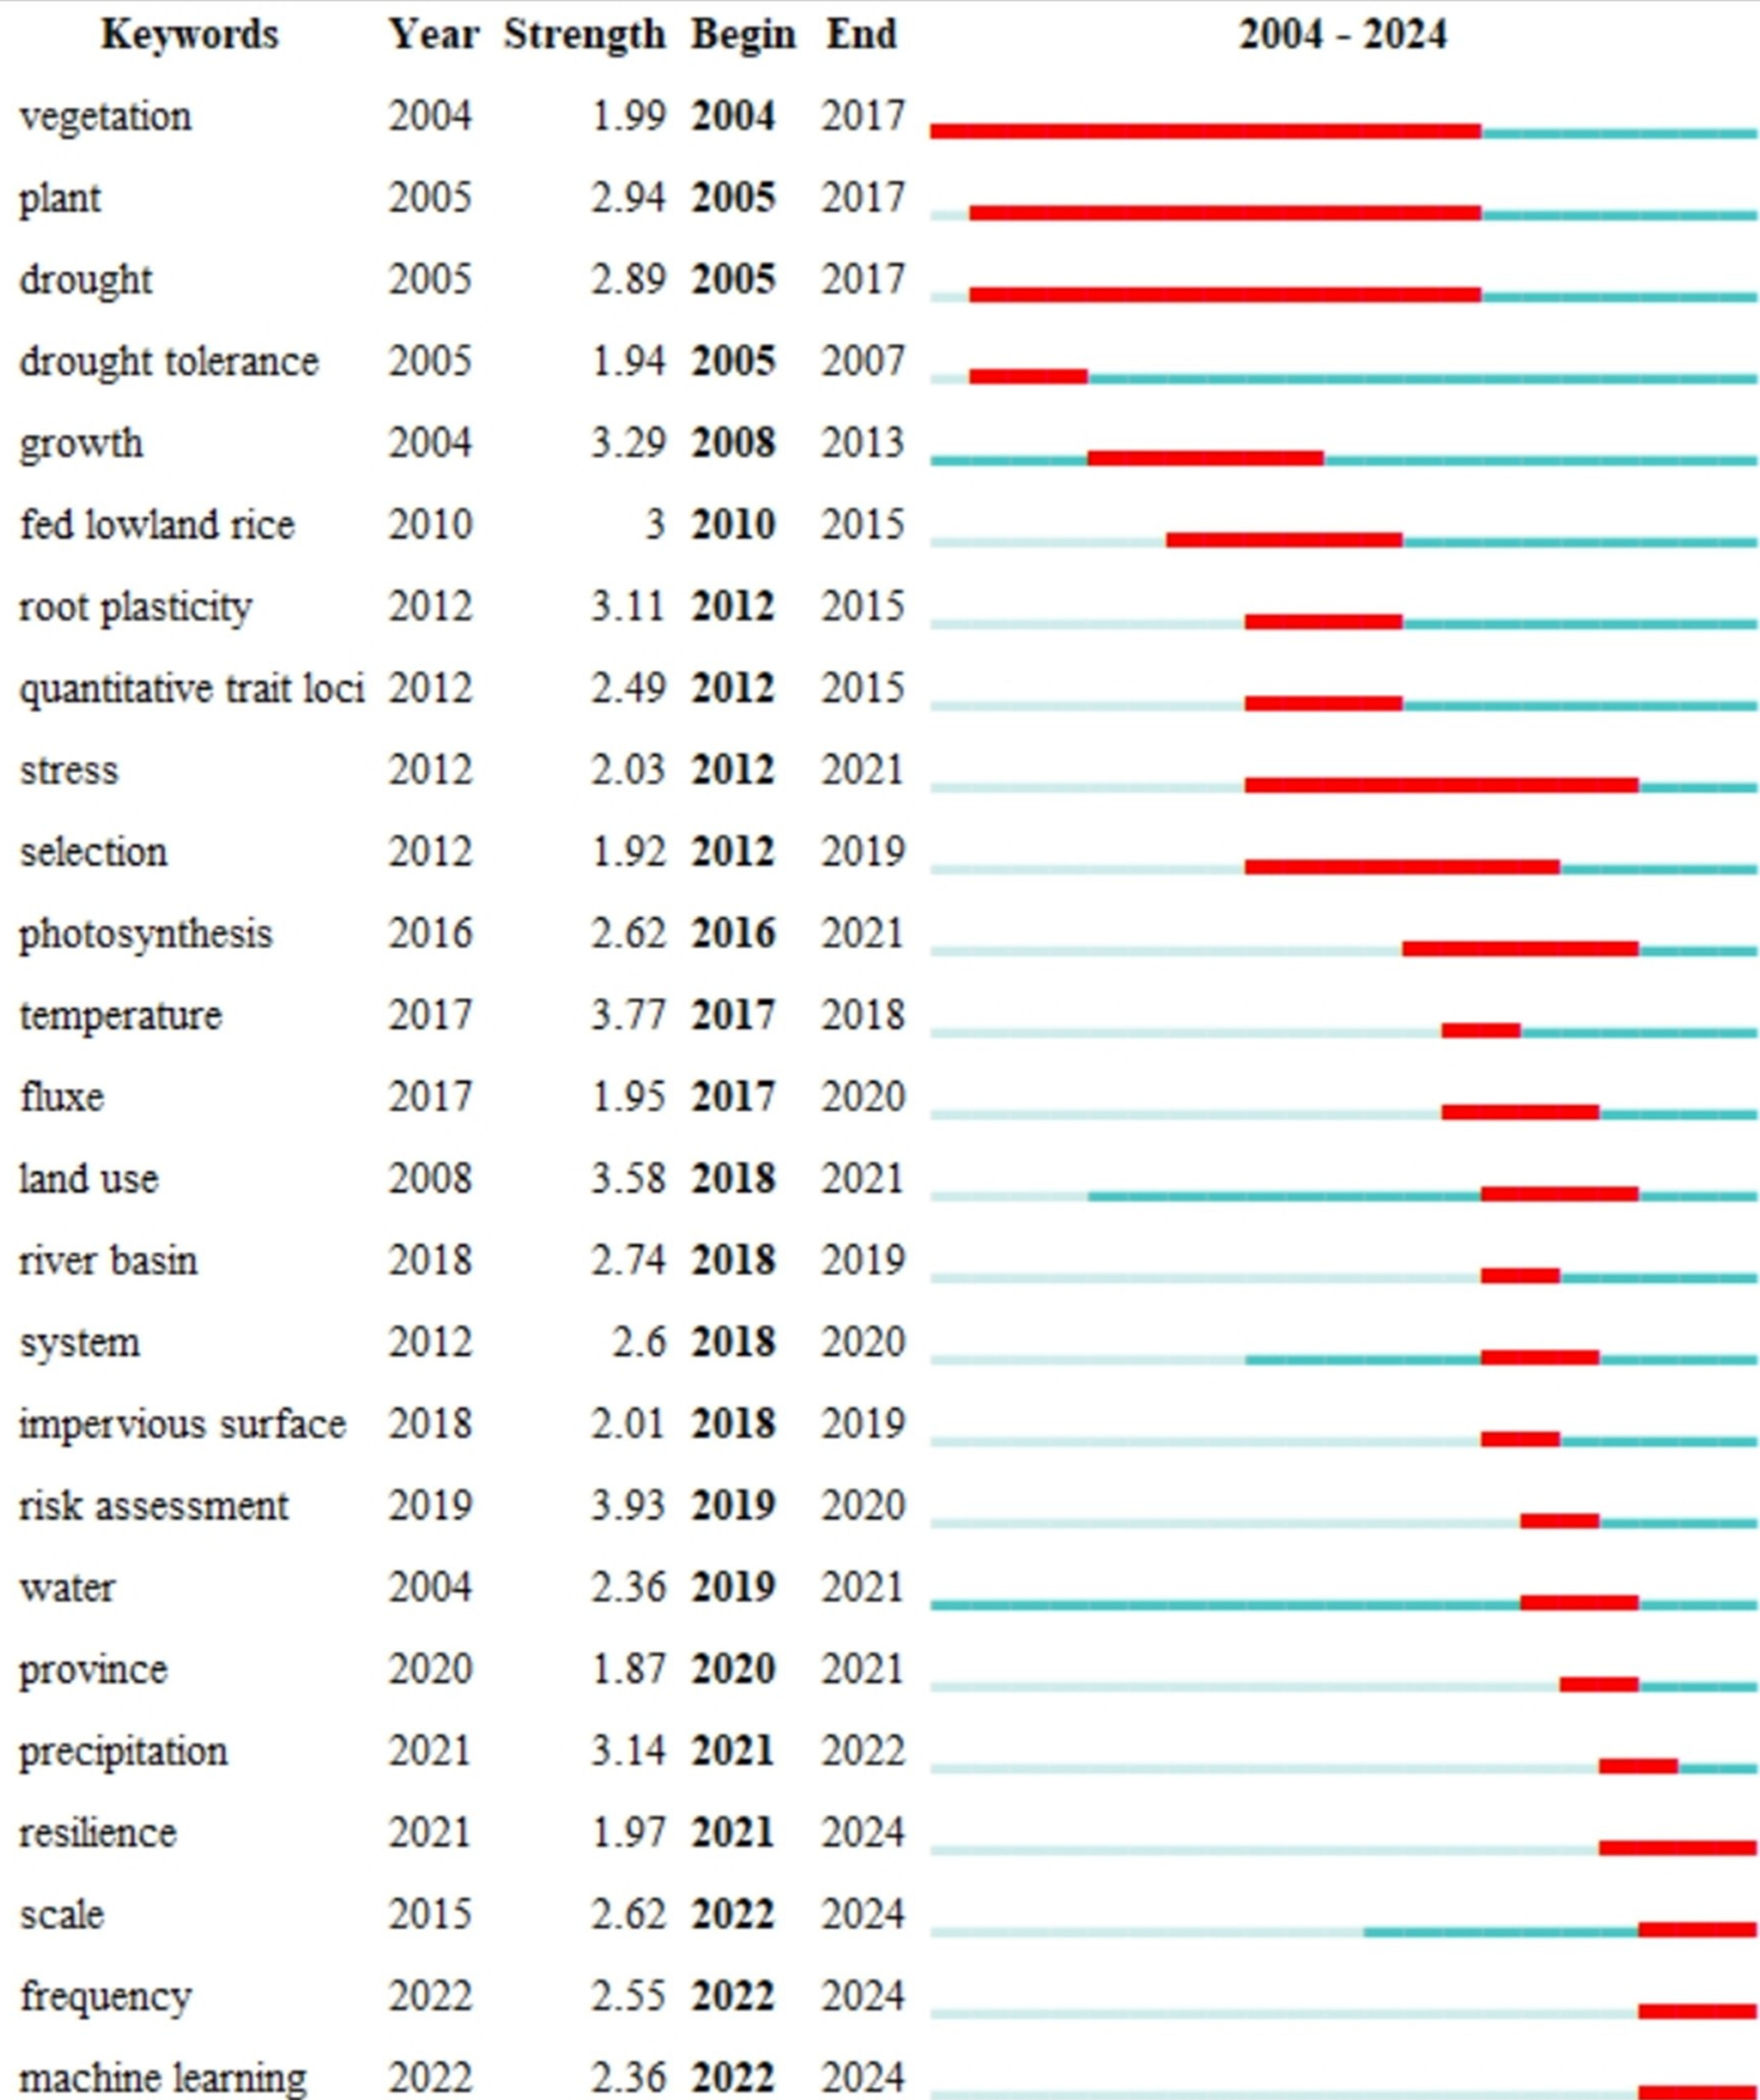

Supplement: Supplementary file 1 [file 0b16a05623e895ab5de9b01d.pdf]
